# Supplementary material
Source: MDPI journal article supplement (https://www.mdpi.com/2071-1050/14/10/6174)
Supplement: s1 [file s1]

# Ol3 Statement

Result sheet building – new building

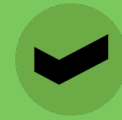

www.baubook.at/eco2soft  
Ökobilanz für Gebäude

Project name: CLT

## building overall

|                            |                                                                           |                                   |                                                                             |
|----------------------------|---------------------------------------------------------------------------|-----------------------------------|-----------------------------------------------------------------------------|
| <b>*Ol3 BG3 ref. Area:</b> | 102 points                                                                | <b>GFA:</b>                       | 3.000 m <sup>2</sup>                                                        |
| <b>El10:</b>               | 7,24 points                                                               | <b>ref. area<sub>Ol</sub>:</b>    | 3.000 m <sup>2</sup>                                                        |
| <b>PENRT:</b>              | 1.967 MJ / (m <sup>2</sup> ref. area <sub>Ol</sub> )                      | <b>catalog of LCA indicators:</b> | IBO benchmarks 2012                                                         |
| <b>GWP-total:</b>          | -212 kg CO <sub>2</sub> equ. / (m <sup>2</sup> ref. area <sub>Ol</sub> )  | <b>useful life considered:</b>    | yes, replacements rates with whole numbers (according to EN 15804 standard) |
| <b>AP:</b>                 | 0,541 kg SO <sub>2</sub> equ. / (m <sup>2</sup> ref. area <sub>Ol</sub> ) | <b>study period:</b>              | 50 years                                                                    |
| <b>Guide version Ol3:</b>  | V4.0 (September 2018)                                                     | <b>service life catalog:</b>      | 2018                                                                        |
| <b>Guide version El10:</b> | V2, 2018                                                                  |                                   |                                                                             |

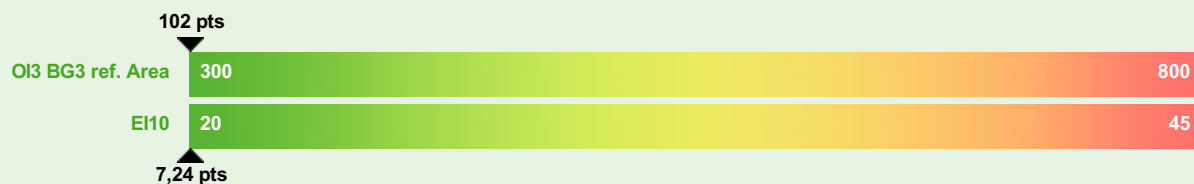

\* Taking into account the manufacturing phase (A1-A3) and the use phase (B1-B4) of EN 15804

test- and educational-version. not for commercial use!

→ subscribe to full version (with costs)

## components from the energy certificate

| quantity                | building element | <b>ΔOl3</b>    |                    | PENRT<br>MJ  | GWP-total<br>kg CO <sub>2</sub> equ. | AP<br>kg SO <sub>2</sub> equ. | EI <sub>KON</sub><br>per m <sup>2</sup> |
|-------------------------|------------------|----------------|--------------------|--------------|--------------------------------------|-------------------------------|-----------------------------------------|
|                         |                  | BG3, ref. Area | per m <sup>2</sup> |              |                                      |                               |                                         |
| 1.715,00 m <sup>2</sup> | F1_F1-8_in       | 34             | 60                 | 653          | -73                                  | 0,185                         | 0,37                                    |
| 190,00 m <sup>2</sup>   | F2_F1-8_ex       | 3              | 46                 | 59           | -9                                   | 0,018                         | 0,11                                    |
| 268,00 m <sup>2</sup>   | R1               | 7              | 82                 | 136          | -8                                   | 0,031                         | 0,45                                    |
| 30,00 m <sup>2</sup>    | R2               | 0              | 44                 | 9            | -1                                   | 0,003                         | 0,06                                    |
| 212,00 m <sup>2</sup>   | W1_F1_L_ex       | 3              | 49                 | 65           | -6                                   | 0,017                         | 0,43                                    |
| 178,00 m <sup>2</sup>   | W2_F1_L_in       | 3              | 55                 | 64           | -8                                   | 0,018                         | 0,44                                    |
| 1.035,00 m <sup>2</sup> | W3_F2-8_L_ex1    | 17             | 48                 | 308          | -27                                  | 0,081                         | 0,44                                    |
| 219,00 m <sup>2</sup>   | W4_F2-8_L_ex2    | 3              | 43                 | 69           | -12                                  | 0,021                         | 0,30                                    |
| 77,00 m <sup>2</sup>    | W5_F2-8_L_ex3    | 1              | 45                 | 23           | -3                                   | 0,006                         | 0,40                                    |
| 925,00 m <sup>2</sup>   | W6_F2-8_L_in     | 16             | 52                 | 312          | -37                                  | 0,087                         | 0,44                                    |
| 211,00 m <sup>2</sup>   | W7_F1-8_L_in     | 3              | 43                 | 54           | -4                                   | 0,014                         | 0,41                                    |
| <b>sum</b>              |                  |                |                    | <b>1.751</b> | <b>-186</b>                          | <b>0,480</b>                  |                                         |

## interior walls

| quantity              | building element | <b>ΔOl3</b>    |                    | PENRT<br>MJ | GWP-total<br>kg CO <sub>2</sub> equ. | AP<br>kg SO <sub>2</sub> equ. | EI <sub>KON</sub><br>per m <sup>2</sup> |
|-----------------------|------------------|----------------|--------------------|-------------|--------------------------------------|-------------------------------|-----------------------------------------|
|                       |                  | BG3, ref. Area | per m <sup>2</sup> |             |                                      |                               |                                         |
| 538,00 m <sup>2</sup> | stair            | 2              | 10                 | 38          | -5,5                                 | 0,0114                        | 0,01                                    |
| 406,00 m <sup>2</sup> | W8_F1-8_N_in     | 5              | 35                 | 94          | -10,5                                | 0,0255                        | 0,19                                    |
| 303,00 m <sup>2</sup> | W9_F1-8_N_in     | 4              | 42                 | 84          | -9,9                                 | 0,0233                        | 0,20                                    |
| <b>sum</b>            |                  |                |                    | <b>215</b>  | <b>-26,0</b>                         | <b>0,0602</b>                 |                                         |

test- and educational-version. not for commercial use!

→ subscribe to full version (with costs)

## graphic details of solid and transparent building elements

## Project name: CLT

### F1\_F1-8\_in (components from the energy certificate, BG3)

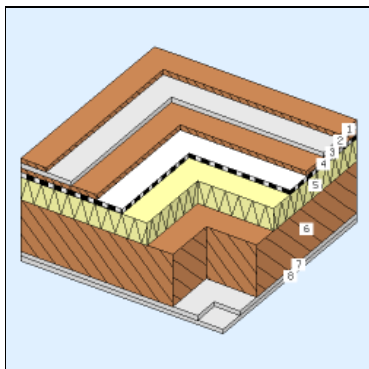

**ΣΔOI3:** 60 points/m<sup>2</sup>

**El<sub>KON</sub>:** 0,37 points/m<sup>2</sup>

**mass:** 164,6 kg/m<sup>2</sup>

**PENRT:** 1.142 MJ/m<sup>2</sup>

**GWP-total:** -127 kg CO<sub>2</sub> equ./m<sup>2</sup>

**AP:** 0,323 kg SO<sub>2</sub> equ./m<sup>2</sup>

**service life:** yes, replacements rates with whole numbers (according to EN 15804 standard)

| no. layer                                                                                                          | d <sub>cm</sub> | Useful life >b  | ΔOI3<br>pts/m <sup>2</sup> | Disposal-<br>classification | Exploitation<br>potential |
|--------------------------------------------------------------------------------------------------------------------|-----------------|-----------------|----------------------------|-----------------------------|---------------------------|
| 1 Trittschalldämmung (Isover Akustic EP3) (Timber (525 kg/m <sup>3</sup> - e.g. larch) - rough, technically drier) | 1,30            | 50              | 0                          | 1                           | 1                         |
| 2 Rigidur Estrichelement (Rigips Feuerschutzplatte)                                                                | 1,25            | 50              | 2                          | 4                           | 3                         |
| 3 Splittschüttung gebunden (MDF panels semi-dense fibreboard (400 kg/m <sup>3</sup> ))                             | 2,20            | 50              | 7                          | 3                           | 3                         |
| 4 Rieselschutz (Sisalex™ 30)                                                                                       | 0,01            | <sup>1</sup> 50 | <sup>2</sup> 0             | 3                           | 3                         |
| 5 Brettsperrholz BBS (5-lagig) (Mineral thermal insulating panel (93 kg/m <sup>3</sup> ))                          | 10,00           | 50              | 8                          | 2                           | 3                         |
| 6 schallentkoppelte U-Direktabhängiger mit Rigips CD Profil / Mineralwolle (z. B. Isover Trennwand Filz)           | 23,00           | 100             | 40                         | 1                           | 1                         |
| 7 Rigips Feuerschutzplatte                                                                                         | 1,25            | 50              | 2                          | 4                           | 3                         |
| 8 Rigips Feuerschutzplatte                                                                                         | 1,25            | 50              | 2                          | 4                           | 3                         |
| <b>building element</b>                                                                                            | <b>40,26</b>    |                 |                            |                             |                           |

**annotations:** Importiert am 06. 03. 2022: Bauteil "DE06e\_" aus Gebäude ""

<sup>1</sup> self-entered value <sup>2</sup> layer is OI-relevant from BG1

16. 05. 2022, Qiming SUN (Tianjin University)

## Project name: CLT

### F2\_F1-8\_ex (components from the energy certificate, BG3)

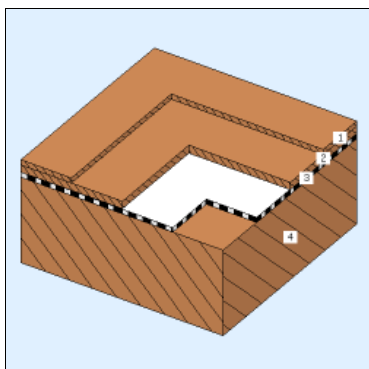

**ΣΔOI3:** 46 points/m<sup>2</sup>

**El<sub>KON</sub>:** 0,11 points/m<sup>2</sup>

**mass:** 124,2 kg/m<sup>2</sup>

**PENRT:** 925 MJ/m<sup>2</sup>

**GWP-total:** -140 kg CO<sub>2</sub> equ./m<sup>2</sup>

**AP:** 0,288 kg SO<sub>2</sub> equ./m<sup>2</sup>

**service life:** yes, replacements rates with whole numbers (according to EN 15804 standard)

| no. layer                                                                                                          | d <sub>cm</sub> | Useful life >b  | ΔOI3<br>pts/m <sup>2</sup> | Disposal-<br>classification | Exploitation<br>potential |
|--------------------------------------------------------------------------------------------------------------------|-----------------|-----------------|----------------------------|-----------------------------|---------------------------|
| 1 Trittschalldämmung (Isover Akustic EP3) (Timber (525 kg/m <sup>3</sup> - e.g. larch) - rough, technically drier) | 1,30            | 50              | 0                          | 1                           | 1                         |
| 2 Splittschüttung gebunden (MDF panels semi-dense fibreboard (400 kg/m <sup>3</sup> ))                             | 2,00            | 50              | 6                          | 3                           | 3                         |
| 3 Rieselschutz (Sisalex™ 30)                                                                                       | 0,01            | <sup>1</sup> 50 | <sup>2</sup> 0             | 3                           | 3                         |
| 4 schallentkoppelte U-Direktabhängiger mit Rigips CD Profil / Mineralwolle (z. B. Isover Trennwand Filz)           | 23,00           | 100             | 40                         | 1                           | 1                         |
| <b>building element</b>                                                                                            | <b>26,31</b>    |                 |                            |                             |                           |

**annotations:** Importiert am 06. 03. 2022: Bauteil "DE06e\_" aus Gebäude ""

<sup>1</sup> self-entered value <sup>2</sup> layer is OI-relevant from BG1

16. 05. 2022, Qiming SUN (Tianjin University)

## Project name: CLT

### R1 (components from the energy certificate, BG3)

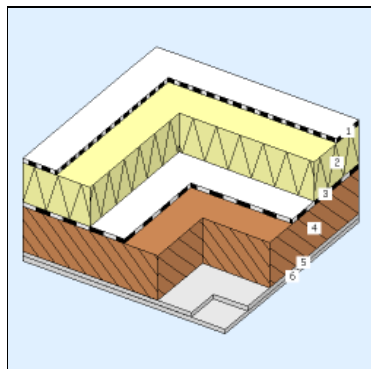

$\Sigma\Delta\text{OI3}$ : 82 points/m<sup>2</sup>

$\text{EI}_{\text{KON}}$ : 0,45 points/m<sup>2</sup>

mass: 152,3 kg/m<sup>2</sup>

PENRT: 1.521 MJ/m<sup>2</sup>

GWP-total: -87,0 kg CO<sub>2</sub> equ./m<sup>2</sup>

AP: 0,343 kg SO<sub>2</sub> equ./m<sup>2</sup>

service life: yes, replacements rates with whole numbers (according to EN 15804 standard)

0,142 W/m<sup>2</sup>K

U value <sup>3</sup>

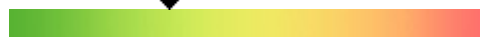

A++

OI-Class (BG3) <sup>4</sup>

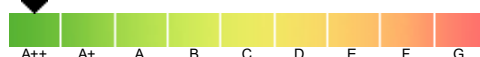

| no. layer                                                                                              | d<br>cm      | Useful life >b  | $\Delta\text{OI3}$<br>pts/m <sup>2</sup> | Disposal-<br>classification | Exploitation<br>potential |
|--------------------------------------------------------------------------------------------------------|--------------|-----------------|------------------------------------------|-----------------------------|---------------------------|
| 1 gewebearmierte Kunststoff-Schweißbahn (>1,7 kg/m <sup>2</sup> ) (Polyethylene (PE) sealing sheeting) | 0,25         | 25              | <sup>1</sup> 18                          | 3                           | 4                         |
| 2 Expandiertes Polystyrol (Gefälledämmung) (Mineral thermal insulating panel (93 kg/m <sup>3</sup> ))  | 20,00        | 50              | 16                                       | 2                           | 3                         |
| 3 Abdichtungsbahn (sd=220m) (Bauder TEC KSD, Bauder TEC KSD DUO)                                       | 0,15         | <sup>2</sup> 50 | <sup>1</sup> 4                           | 3                           | 5                         |
| 4 Brettsperrholz BBS (5-lagig) (KLH® - CLT)                                                            | 23,00        | 100             | 40                                       | 1                           | 1                         |
| 5 Brettsperrholz BBS (5-lagig) (Rigips Feuerschutzplatte)                                              | 1,25         | 50              | 2                                        | 4                           | 3                         |
| 6 Brettsperrholz BBS (5-lagig) (Rigips Feuerschutzplatte)                                              | 1,25         | 50              | 2                                        | 4                           | 3                         |
| <b>building element</b>                                                                                | <b>45,90</b> |                 |                                          |                             |                           |

annotations: Importiert am 06. 03. 2022: Bauteil "DA05a\_" aus Gebäude ""

<sup>1</sup> layer is OI-relevant from BG1 <sup>2</sup> self-entered value <sup>3</sup> U value (Heat transfer coefficient) calculated according to ÖNORM EN ISO 6946. <sup>4</sup> For the OI class, the U-value of the component is taken into account in addition to the ecological key figures

16. 05. 2022, Qiming SUN (Tianjin University)

## Project name: CLT

### R2 (components from the energy certificate, BG3)

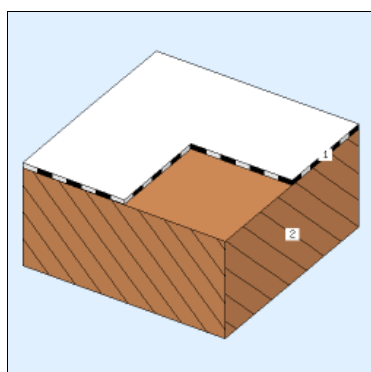

$\Sigma\Delta\text{OI3}$ : 44 points/m<sup>2</sup>

$\text{EI}_{\text{KON}}$ : 0,06 points/m<sup>2</sup>

mass: 111,0 kg/m<sup>2</sup>

PENRT: 887 MJ/m<sup>2</sup>

GWP-total: -119 kg CO<sub>2</sub> equ./m<sup>2</sup>

AP: 0,257 kg SO<sub>2</sub> equ./m<sup>2</sup>

service life: yes, replacements rates with whole numbers (according to EN 15804 standard)

U value <sup>3</sup>

0,484 W/m<sup>2</sup>K

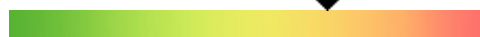

B

OI-Class (BG3) <sup>4</sup>

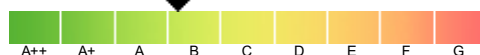

| no. layer                                                        | d<br>cm      | Useful life >b  | $\Delta\text{OI3}$<br>pts/m <sup>2</sup> | Disposal-<br>classification | Exploitation<br>potential |
|------------------------------------------------------------------|--------------|-----------------|------------------------------------------|-----------------------------|---------------------------|
| 1 Abdichtungsbahn (sd=220m) (Bauder TEC KSD, Bauder TEC KSD DUO) | 0,15         | <sup>1</sup> 50 | <sup>2</sup> 4                           | 3                           | 5                         |
| 2 Brettsperrholz BBS (5-lagig) (KLH® - CLT)                      | 23,00        | 100             | 40                                       | 1                           | 1                         |
| <b>building element</b>                                          | <b>23,15</b> |                 |                                          |                             |                           |

annotations: Importiert am 06. 03. 2022: Bauteil "DA05a\_" aus Gebäude ""

<sup>1</sup> self-entered value <sup>2</sup> layer is OI-relevant from BG1 <sup>3</sup> U value (Heat transfer coefficient) calculated according to ÖNORM EN ISO 6946. <sup>4</sup> For the OI class, the U-value of the component is taken into account in addition to the ecological key figures

16. 05. 2022, Qiming SUN (Tianjin University)

Project name: CLT

W1\_F1\_L\_ex (components from the energy certificate, BG3)

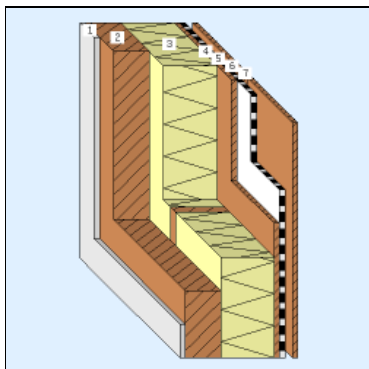

$\Sigma \Delta OI3$ : 49 points/m<sup>2</sup>  
 $E_{l_{kon}}$ : 0,43 points/m<sup>2</sup>  
 mass: 120,3 kg/m<sup>2</sup>  
 $PENRT$ : 923 MJ/m<sup>2</sup>  
 $GWP$ -total: -84,8 kg CO<sub>2</sub> equ./m<sup>2</sup>  
 $AP$ : 0,245 kg SO<sub>2</sub> equ./m<sup>2</sup>  
 service life: yes, replacements rates with whole numbers (according to EN 15804 standard)

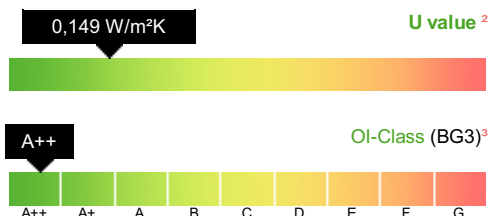

| no. layer (from inside to outside)                                                                           | d<br>cm      | Useful life >b | $\Delta OI3$<br>pts/m <sup>2</sup> | Disposal-<br>classification | Exploitation<br>potential |
|--------------------------------------------------------------------------------------------------------------|--------------|----------------|------------------------------------|-----------------------------|---------------------------|
| 1 Rigips Feuerschutzplatte ( <i>Rigips Feuerschutzplatte</i> )                                               | 1,25         | 50             | 2                                  | 4                           | 3                         |
| 2 Brettsperrholz BBS (3-lagig) ( <i>KLH® - CLT</i> )                                                         | 14,50        | 100            | 25                                 | 1                           | 1                         |
| 3 <i>inhomogeneous (parts vertical)</i>                                                                      | 22,00        |                |                                    |                             |                           |
| 115 cm (96%) Mineral thermal insulating panel (93 kg/m <sup>3</sup> )                                        | 22,00        | 50             | 17                                 | 2                           | 3                         |
| 5 cm (4%) Timber (475 kg/m <sup>3</sup> - e.g. spruce/fir) - rough, technically dried                        | 22,00        | 100            | 0                                  | 1                           | 1                         |
| 4 MDF panels semi-dense fibreboard (400 kg/m <sup>3</sup> )                                                  | 1,50         | 50             | 4                                  | 3                           | 3                         |
| 5 Unterspannbahn ( <i>Polyethylene (PE) sealing sheeting</i> )                                               | 0,02         | 25             | <sup>1</sup> 1                     | 3                           | 4                         |
| 6 <i>inhomogeneous (parts vertical)</i>                                                                      | 3,00         |                |                                    |                             |                           |
| 115 cm (96%) Vertical air layer, heat flow down 26 < d <= 30 mm                                              | 3,00         |                | <sup>1</sup> 0                     | 0                           | 0                         |
| 5 cm (4%) Timber (475 kg/m <sup>3</sup> - e.g. spruce/fir) - rough, technically dried                        | 3,00         | 50             | <sup>1</sup> 0                     | 1                           | 1                         |
| 7 Holz Außenwandverkleidung ( <i>Timber (525 kg/m<sup>3</sup> - e.g. larch) - rough, technically dried</i> ) | 2,00         | 50             | <sup>1</sup> 0                     | 1                           | 1                         |
| <b>building element</b>                                                                                      | <b>44,27</b> |                |                                    |                             |                           |

annotations: Importiert am 01. 03. 2022: Bauteil "AW10d\_" aus Gebäude ""

<sup>1</sup> layer is OI-relevant from BG1 <sup>2</sup> U value (Heat transfer coefficient) calculated according to ÖNORM EN ISO 6946. <sup>3</sup> For the OI class, the U-value of the component is taken into account in addition to the ecological key figures

16. 05. 2022, Qiming SUN (Tianjin University)

Project name: CLT

W2\_F1\_L\_in (components from the energy certificate, BG3)

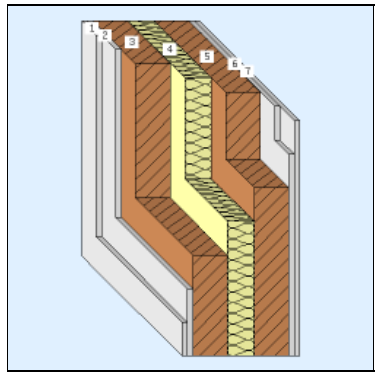

$\Sigma\Delta OI3$ : 55 points/m<sup>2</sup>  
 $E_{l_{kon}}$ : 0,44 points/m<sup>2</sup>  
**mass**: 165,8 kg/m<sup>2</sup>  
**PENRT**: 1.082 MJ/m<sup>2</sup>  
**GWP-total**: -129 kg CO<sub>2</sub> equ./m<sup>2</sup>  
**AP**: 0,303 kg SO<sub>2</sub> equ./m<sup>2</sup>  
**service life**: yes, replacements rates with whole numbers (according to EN 15804 standard)

| no. layer (from inside to outside)                       | d<br>cm | Useful life >b | $\Delta OI3$<br>pts/m <sup>2</sup> | Disposal-<br>classification | Exploitation<br>potential |
|----------------------------------------------------------|---------|----------------|------------------------------------|-----------------------------|---------------------------|
| 1 Rigips Feuerschutzplatte                               | 1,25    | 50             | <sup>1</sup> 2                     | 4                           | 3                         |
| 2 Rigips Feuerschutzplatte                               | 1,25    | 50             | <sup>1</sup> 2                     | 4                           | 3                         |
| 3 Brettsperrholz BBS (3-lagig) (KLH® - CLT)              | 13,00   | 100            | <sup>1</sup> 23                    | 1                           | 1                         |
| 4 Sheep's wool - insulation felt (18 kg/m <sup>3</sup> ) | 10,00   | 50             | <sup>1</sup> 2                     | 3                           | 3                         |
| 5 Brettsperrholz BBS (3-lagig) (KLH® - CLT)              | 13,00   | 100            | <sup>1</sup> 23                    | 1                           | 1                         |
| 6 Rigips Feuerschutzplatte                               | 1,25    | 50             | <sup>1</sup> 2                     | 4                           | 3                         |
| 7 Rigips Feuerschutzplatte                               | 1,25    | 50             | <sup>1</sup> 2                     | 4                           | 3                         |
| building element                                         | 41,00   |                |                                    |                             |                           |

annotations: Importiert am 06. 03. 2022: Bauteil "IW11b\_" aus Gebäude ""

<sup>1</sup> layer is OI-relevant from BG3

16. 05. 2022, Qiming SUN (Tianjin University)

## Project name: CLT

### W3\_F2-8\_L\_ex1 (components from the energy certificate, BG3)

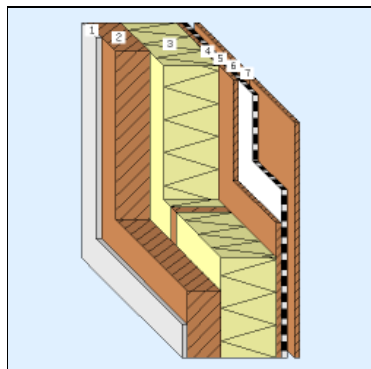

**$\Sigma \Delta OI3$ :** 48 points/m<sup>2</sup>  
 **$E_{I_{KON}}$ :** 0,44 points/m<sup>2</sup>  
**mass:** 117,6 kg/m<sup>2</sup>  
**PENRT:** 894 MJ/m<sup>2</sup>  
**GWP-total:** -79,3 kg CO<sub>2</sub> equ./m<sup>2</sup>  
**AP:** 0,235 kg SO<sub>2</sub> equ./m<sup>2</sup>  
**service life:** yes, replacements rates with whole numbers (according to EN 15804 standard)

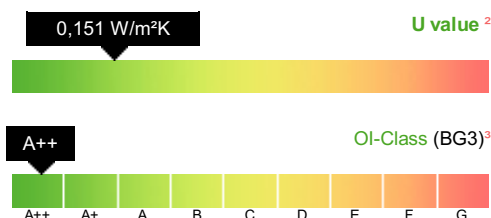

| no. layer (from inside to outside)                                                                   | d<br>cm      | Useful life >b | $\Delta OI3$<br>pts/m <sup>2</sup> | Disposal-<br>classification | Exploitation<br>potential |
|------------------------------------------------------------------------------------------------------|--------------|----------------|------------------------------------|-----------------------------|---------------------------|
| 1 Rigips Feuerschutzplatte (Rigips Feuerschutzplatte)                                                | 1,50         | 50             | 2                                  | 4                           | 3                         |
| 2 Brettsperrholz BBS (3-lagig) (KLH® - CLT)                                                          | 13,50        | 100            | 24                                 | 1                           | 1                         |
| 3 inhomogeneous (parts vertical)                                                                     | 22,00        |                |                                    |                             |                           |
| 115 cm (96%) Mineral thermal insulating panel (93 kg/m <sup>3</sup> )                                | 22,00        | 50             | 17                                 | 2                           | 3                         |
| 5 cm (4%) Timber (475 kg/m <sup>3</sup> - e.g. spruce/fir) - rough, technically dried                | 22,00        | 100            | 0                                  | 1                           | 1                         |
| 4 MDF panels semi-dense fibreboard (400 kg/m <sup>3</sup> )                                          | 1,50         | 50             | 4                                  | 3                           | 3                         |
| 5 Unterspännbahn (Polyethylene (PE) sealing sheeting)                                                | 0,02         | 25             | <sup>1</sup> 1                     | 3                           | 4                         |
| 6 inhomogeneous (parts vertical)                                                                     | 3,00         |                |                                    |                             |                           |
| 115 cm (96%) Vertical air layer, heat flow down 26 < d <= 30 mm                                      | 3,00         |                | <sup>1</sup> 0                     | 0                           | 0                         |
| 5 cm (4%) Timber (475 kg/m <sup>3</sup> - e.g. spruce/fir) - rough, technically dried                | 3,00         | 50             | <sup>1</sup> 0                     | 1                           | 1                         |
| 7 Holz Außenwandverkleidung (Timber (525 kg/m <sup>3</sup> - e.g. larch) - rough, technically dried) | 2,00         | 50             | <sup>1</sup> 0                     | 1                           | 1                         |
| <b>building element</b>                                                                              | <b>43,52</b> |                |                                    |                             |                           |

annotations: Importiert am 01. 03. 2022: Bauteil "AW10d\_" aus Gebäude ""

<sup>1</sup> layer is OI-relevant from BG1 <sup>2</sup> U value (Heat transfer coefficient) calculated according to ÖNORM EN ISO 6946. <sup>3</sup> For the OI class, the U-value of the component is taken into account in addition to the ecological key figures

16. 05. 2022, Qiming SUN (Tianjin University)

## Project name: CLT

### W4\_F2-8\_L\_ex2 (components from the energy certificate, BG3)

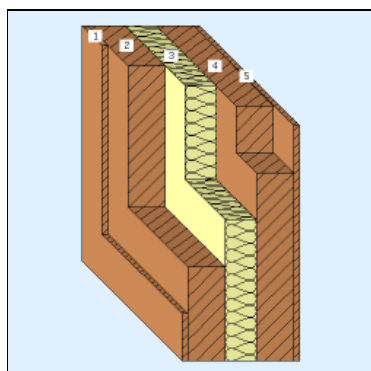

**$\Sigma \Delta OI3$ :** 43 points/m<sup>2</sup>  
 **$E_{I_{KON}}$ :** 0,30 points/m<sup>2</sup>  
**mass:** 136,8 kg/m<sup>2</sup>  
**PENRT:** 945 MJ/m<sup>2</sup>  
**GWP-total:** -159 kg CO<sub>2</sub> equ./m<sup>2</sup>  
**AP:** 0,287 kg SO<sub>2</sub> equ./m<sup>2</sup>  
**service life:** yes, replacements rates with whole numbers (according to EN 15804 standard)

| no. layer (from inside to outside)                                       | d<br>cm      | Useful life >b | $\Delta OI3$<br>pts/m <sup>2</sup> | Disposal-<br>classification | Exploitation<br>potential |
|--------------------------------------------------------------------------|--------------|----------------|------------------------------------|-----------------------------|---------------------------|
| 1 Timber (525 kg/m <sup>3</sup> - e.g. larch) - rough, technically dried | 2,00         | 50             | <sup>1</sup> 0                     | 1                           | 1                         |
| 2 Brettsperrholz BBS (3-lagig) (KLH® - CLT)                              | 12,00        | 100            | <sup>1</sup> 21                    | 1                           | 1                         |
| 3 Sheep's wool - insulation felt (18 kg/m <sup>3</sup> )                 | 10,00        | 50             | <sup>1</sup> 2                     | 3                           | 3                         |
| 4 Brettsperrholz BBS (3-lagig) (KLH® - CLT)                              | 12,00        | 100            | <sup>1</sup> 21                    | 1                           | 1                         |
| 5 Timber (525 kg/m <sup>3</sup> - e.g. larch) - rough, technically dried | 2,00         | 50             | <sup>1</sup> 0                     | 1                           | 1                         |
| <b>building element</b>                                                  | <b>38,00</b> |                |                                    |                             |                           |

annotations: Importiert am 06. 03. 2022: Bauteil "IW11b\_" aus Gebäude ""

<sup>1</sup> layer is OI-relevant from BG3

16. 05. 2022, Qiming SUN (Tianjin University)

## Project name: CLT

### W5\_F2-8\_L\_ex3 (components from the energy certificate, BG3)

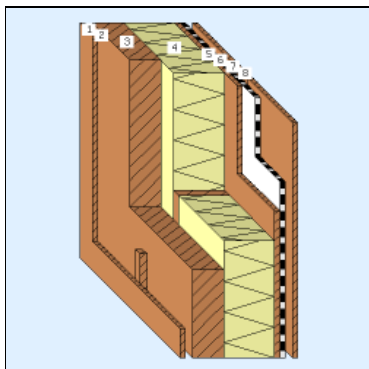

$\Sigma \Delta OI3$ : 45 points/m<sup>2</sup>

$E_{l_{kon}}$ : 0,40 points/m<sup>2</sup>

mass: 116,5 kg/m<sup>2</sup>

PENRT: 887 MJ/m<sup>2</sup>

GWP-total: -99,4 kg CO<sub>2</sub> equ./m<sup>2</sup>

AP: 0,242 kg SO<sub>2</sub> equ./m<sup>2</sup>

service life: yes, replacements rates with whole numbers (according to EN 15804 standard)

0,152 W/m<sup>2</sup>K

U value <sup>2</sup>

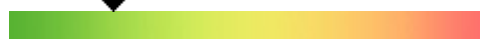

A++

OI-Class (BG3) <sup>3</sup>

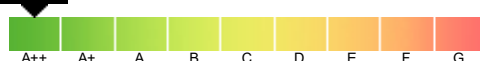

| no. layer (from inside to outside)                                                                   | d<br>cm      | Useful life >b | $\Delta OI3$<br>pts/m <sup>2</sup> | Disposal-<br>classification | Exploitation<br>potential |
|------------------------------------------------------------------------------------------------------|--------------|----------------|------------------------------------|-----------------------------|---------------------------|
| 1 Holz Außenwandverkleidung (Timber (525 kg/m <sup>3</sup> - e.g. larch) - rough, technically dried) | 2,00         | 50             | <sup>1</sup> 0                     | 1                           | 1                         |
| 2 inhomogeneous (parts vertical)                                                                     | 3,00         |                |                                    |                             |                           |
| 115 cm (96%) Vertical air layer, heat flow down 26 < d <= 30 mm                                      | 3,00         |                | <sup>1</sup> 0                     | 0                           | 0                         |
| 5 cm (4%) Timber (475 kg/m <sup>3</sup> - e.g. spruce/fir) - rough, technically dried                | 3,00         | 50             | <sup>1</sup> 0                     | 1                           | 1                         |
| 3 Brettsperrholz BBS (3-lagig) (KLH® - CLT)                                                          | 13,50        | 100            | 24                                 | 1                           | 1                         |
| 4 inhomogeneous (parts vertical)                                                                     | 22,00        |                |                                    |                             |                           |
| 115 cm (96%) Mineral thermal insulating panel (93 kg/m <sup>3</sup> )                                | 22,00        | 50             | 17                                 | 2                           | 3                         |
| 5 cm (4%) Timber (475 kg/m <sup>3</sup> - e.g. spruce/fir) - rough, technically dried                | 22,00        | 100            | 0                                  | 1                           | 1                         |
| 5 MDF panels semi-dense fibreboard (400 kg/m <sup>3</sup> )                                          | 1,50         | 50             | 4                                  | 3                           | 3                         |
| 6 Unterspannbahn (Polyethylene (PE) sealing sheeting)                                                | 0,02         | 25             | <sup>1</sup> 1                     | 3                           | 4                         |
| 7 inhomogeneous (parts vertical)                                                                     | 3,00         |                |                                    |                             |                           |
| 115 cm (96%) Vertical air layer, heat flow down 26 < d <= 30 mm                                      | 3,00         |                | <sup>1</sup> 0                     | 0                           | 0                         |
| 5 cm (4%) Timber (475 kg/m <sup>3</sup> - e.g. spruce/fir) - rough, technically dried                | 3,00         | 50             | <sup>1</sup> 0                     | 1                           | 1                         |
| 8 Holz Außenwandverkleidung (Timber (525 kg/m <sup>3</sup> - e.g. larch) - rough, technically dried) | 2,00         | 50             | <sup>1</sup> 0                     | 1                           | 1                         |
| <b>building element</b>                                                                              | <b>47,02</b> |                |                                    |                             |                           |

annotations: Importiert am 01. 03. 2022: Bauteil "AW10d\_" aus Gebäude ""

<sup>1</sup> layer is OI-relevant from BG1 <sup>2</sup> U value (Heat transfer coefficient) calculated according to ÖNORM EN ISO 6946. <sup>3</sup> For the OI class, the U-value of the component is taken into account in addition to the ecological key figures

16. 05. 2022, Qiming SUN (Tianjin University)

Project name: CLT

W6\_F2-8\_L\_in (components from the energy certificate, BG3)

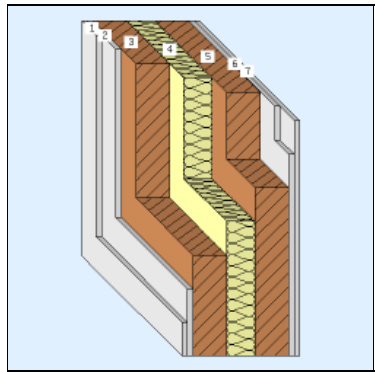

$\Sigma \Delta OI3$ : 52 points/m<sup>2</sup>  
 $E_{l_{kon}}$ : 0,44 points/m<sup>2</sup>  
**mass**: 156,3 kg/m<sup>2</sup>  
**PENRT**: 1.012 MJ/m<sup>2</sup>  
**GWP-total**: -118 kg CO<sub>2</sub> equ./m<sup>2</sup>  
**AP**: 0,282 kg SO<sub>2</sub> equ./m<sup>2</sup>  
**service life**: yes, replacements rates with whole numbers (according to EN 15804 standard)

| no.              | layer (from inside to outside)                         | d<br>cm | Useful life >b | $\Delta OI3$<br>pts/m <sup>2</sup> | Disposal-<br>classification | Exploitation<br>potential |
|------------------|--------------------------------------------------------|---------|----------------|------------------------------------|-----------------------------|---------------------------|
| 1                | Rigips Feuerschutzplatte                               | 1,25    | 50             | <sup>1</sup> 2                     | 4                           | 3                         |
| 2                | Rigips Feuerschutzplatte                               | 1,25    | 50             | <sup>1</sup> 2                     | 4                           | 3                         |
| 3                | Brettsperrholz BBS (3-lagig) (KLH® - CLT)              | 12,00   | 100            | <sup>1</sup> 21                    | 1                           | 1                         |
| 4                | Sheep's wool - insulation felt (18 kg/m <sup>3</sup> ) | 10,00   | 50             | <sup>1</sup> 2                     | 3                           | 3                         |
| 5                | Brettsperrholz BBS (3-lagig) (KLH® - CLT)              | 12,00   | 100            | <sup>1</sup> 21                    | 1                           | 1                         |
| 6                | Rigips Feuerschutzplatte                               | 1,25    | 50             | <sup>1</sup> 2                     | 4                           | 3                         |
| 7                | Rigips Feuerschutzplatte                               | 1,25    | 50             | <sup>1</sup> 2                     | 4                           | 3                         |
| building element |                                                        | 39,00   |                |                                    |                             |                           |

annotations: Importiert am 06. 03. 2022: Bauteil "IW11b\_" aus Gebäude ""

<sup>1</sup> layer is OI-relevant from BG3

16. 05. 2022, Qiming SUN (Tianjin University)



## Project name: CLT

### W7\_F1-8\_L\_in (components from the energy certificate, BG3)

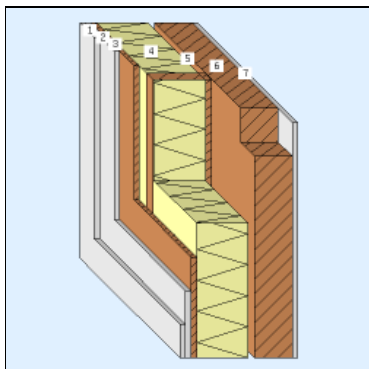

**$\Sigma\Delta\text{OI3}$ :** 43 points/m<sup>2</sup>  
 **$\text{EI}_{\text{KON}}$ :** 0,41 points/m<sup>2</sup>  
**mass:** 110,6 kg/m<sup>2</sup>  
**PENRT:** 764 MJ/m<sup>2</sup>  
**GWP-total:** -53,8 kg CO<sub>2</sub> equ./m<sup>2</sup>  
**AP:** 0,196 kg SO<sub>2</sub> equ./m<sup>2</sup>  
**service life:** yes, replacements rates with whole numbers (according to EN 15804 standard)

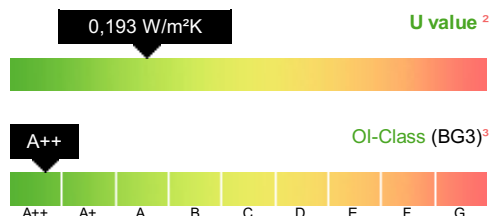

| no. layer (from inside to outside)                                                      | d<br>cm      | Useful life >b | $\Delta\text{OI3}$<br>pts/m <sup>2</sup> | Disposal-<br>classification | Exploitation<br>potential |
|-----------------------------------------------------------------------------------------|--------------|----------------|------------------------------------------|-----------------------------|---------------------------|
| 1 Rigips Feuerschutzplatte (Rigips Feuerschutzplatte)                                   | 1,25         | 50             | 2                                        | 4                           | 3                         |
| 2 Rigips Feuerschutzplatte (Rigips Feuerschutzplatte)                                   | 1,25         | 50             | 2                                        | 4                           | 3                         |
| 3 Holz Außenwandverkleidung (MDF panels semi-dense fibreboard (400 kg/m <sup>3</sup> )) | 1,20         | 50             | <sup>1</sup> 4                           | 3                           | 3                         |
| 4 inhomogeneous (parts vertical)                                                        | 16,50        |                |                                          |                             |                           |
| 115 cm (96%) Mineral thermal insulating panel (93 kg/m <sup>3</sup> )                   | 16,50        | 50             | 13                                       | 2                           | 3                         |
| 5 cm (4%) Timber (475 kg/m <sup>3</sup> - e.g. spruce/fir) - rough, technically dried   | 16,50        | 100            | 0                                        | 1                           | 1                         |
| 5 inhomogeneous (parts vertical)                                                        | 2,00         |                |                                          |                             |                           |
| 115 cm (96%) Vertical air layer, heat flow down 16 < d ≤ 20 mm                          | 2,00         |                | <sup>1</sup> 0                           | 0                           | 0                         |
| 5 cm (4%) Timber (475 kg/m <sup>3</sup> - e.g. spruce/fir) - rough, technically dried   | 2,00         | 100            | <sup>1</sup> 0                           | 1                           | 1                         |
| 6 Brettsperrholz BBS (3-lagig) (KLH® - CLT)                                             | 12,00        | 100            | 21                                       | 1                           | 1                         |
| 7 Rigips Feuerschutzplatte (Rigips Feuerschutzplatte)                                   | 1,25         | 50             | 2                                        | 4                           | 3                         |
| <b>building element</b>                                                                 | <b>35,45</b> |                |                                          |                             |                           |

annotations: Importiert am 01. 03. 2022: Bauteil "AW10d\_" aus Gebäude ""

<sup>1</sup> layer is OI-relevant from BG1 <sup>2</sup> U value (Heat transfer coefficient) calculated according to ÖNORM EN ISO 6946. <sup>3</sup> For the OI class, the U-value of the component is taken into account in addition to the ecological key figures

16. 05. 2022, Qiming SUN (Tianjin University)

## Project name: CLT

### stair (interior walls, BG3)

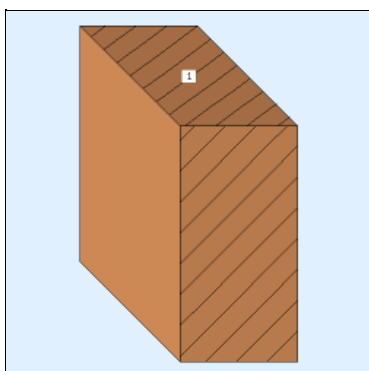

**$\Sigma\Delta\text{OI3}$ :** 10 points/m<sup>2</sup>  
 **$\text{EI}_{\text{KON}}$ :** 0,01 points/m<sup>2</sup>  
**mass:** 28,0 kg/m<sup>2</sup>  
**PENRT:** 209 MJ/m<sup>2</sup>  
**GWP-total:** -30,9 kg CO<sub>2</sub> equ./m<sup>2</sup>  
**AP:** 0,0634 kg SO<sub>2</sub> equ./m<sup>2</sup>  
**service life:** yes, replacements rates with whole numbers (according to EN 15804 standard)

| no. layer (from inside to outside)          | d<br>cm     | Useful life >b | $\Delta\text{OI3}$<br>pts/m <sup>2</sup> | Disposal-<br>classification | Exploitation<br>potential |
|---------------------------------------------|-------------|----------------|------------------------------------------|-----------------------------|---------------------------|
| 1 Brettsperrholz BBS (3-lagig) (KLH® - CLT) | 5,90        | 100            | <sup>1</sup> 10                          | 1                           | 1                         |
| <b>building element</b>                     | <b>5,90</b> |                |                                          |                             |                           |

annotations: Importiert am 06. 03. 2022: Bauteil "IW01b\_" aus Gebäude ""

<sup>1</sup> layer is OI-relevant from BG3

16. 05. 2022, Qiming SUN (Tianjin University)

## Project name: CLT

### W8\_F1-8\_N\_in (interior walls, BG3)

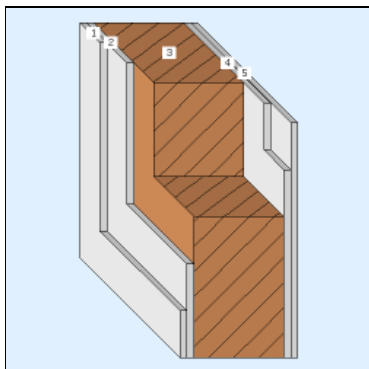

$\Sigma\Delta OI3$ : 35 points/m<sup>2</sup>

$E_{l_{kon}}$ : 0,19 points/m<sup>2</sup>

mass: 116,5 kg/m<sup>2</sup>

PENRT: 692 MJ/m<sup>2</sup>

GWP-total: -77,5 kg CO<sub>2</sub> equ./m<sup>2</sup>

AP: 0,188 kg SO<sub>2</sub> equ./m<sup>2</sup>

service life: yes, replacements rates with whole numbers (according to EN 15804 standard)

| no. layer (from inside to outside)                    | d<br>cm      | Useful life >b | $\Delta OI3$<br>pts/m <sup>2</sup> | Disposal-<br>classification | Exploitation<br>potential |
|-------------------------------------------------------|--------------|----------------|------------------------------------|-----------------------------|---------------------------|
| 1 Rigips Feuerschutzplatte (Rigips Feuerschutzplatte) | 1,25         | 50             | <sup>1</sup> 2                     | 4                           | 3                         |
| 2 Rigips Feuerschutzplatte (Rigips Feuerschutzplatte) | 1,25         | 50             | <sup>1</sup> 2                     | 4                           | 3                         |
| 3 Brettsperrholz BBS (3-lagig) (KLH® - CLT)           | 16,00        | 100            | <sup>1</sup> 28                    | 1                           | 1                         |
| 4 Rigips Feuerschutzplatte (Rigips Feuerschutzplatte) | 1,25         | 50             | <sup>1</sup> 2                     | 4                           | 3                         |
| 5 Rigips Feuerschutzplatte (Rigips Feuerschutzplatte) | 1,25         | 50             | <sup>1</sup> 2                     | 4                           | 3                         |
| <b>building element</b>                               | <b>21,00</b> |                |                                    |                             |                           |

annotations: Importiert am 06. 03. 2022: Bauteil "AW15b\_" aus Gebäude ""

<sup>1</sup> layer is OI-relevant from BG2

16. 05. 2022, Qiming SUN (Tianjin University)

## Project name: CLT

### W9\_F1-8\_N\_in (interior walls, BG3)

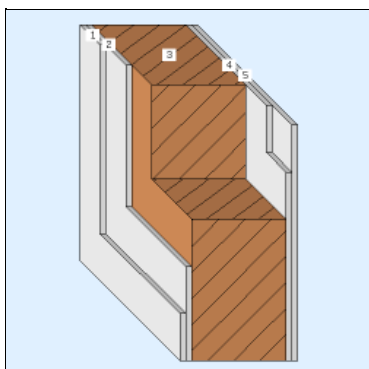

$\Sigma\Delta OI3$ : 42 points/m<sup>2</sup>

$E_{l_{kon}}$ : 0,20 points/m<sup>2</sup>

mass: 135,5 kg/m<sup>2</sup>

PENRT: 834 MJ/m<sup>2</sup>

GWP-total: -98,5 kg CO<sub>2</sub> equ./m<sup>2</sup>

AP: 0,231 kg SO<sub>2</sub> equ./m<sup>2</sup>

service life: yes, replacements rates with whole numbers (according to EN 15804 standard)

| no. layer (from inside to outside)                    | d<br>cm      | Useful life >b | $\Delta OI3$<br>pts/m <sup>2</sup> | Disposal-<br>classification | Exploitation<br>potential |
|-------------------------------------------------------|--------------|----------------|------------------------------------|-----------------------------|---------------------------|
| 1 Rigips Feuerschutzplatte (Rigips Feuerschutzplatte) | 1,25         | 50             | <sup>1</sup> 2                     | 4                           | 3                         |
| 2 Rigips Feuerschutzplatte (Rigips Feuerschutzplatte) | 1,25         | 50             | <sup>1</sup> 2                     | 4                           | 3                         |
| 3 Brettsperrholz BBS (3-lagig) (KLH® - CLT)           | 20,00        | 100            | <sup>1</sup> 35                    | 1                           | 1                         |
| 4 Rigips Feuerschutzplatte (Rigips Feuerschutzplatte) | 1,25         | 50             | <sup>1</sup> 2                     | 4                           | 3                         |
| 5 Rigips Feuerschutzplatte (Rigips Feuerschutzplatte) | 1,25         | 50             | <sup>1</sup> 2                     | 4                           | 3                         |
| <b>building element</b>                               | <b>25,00</b> |                |                                    |                             |                           |

annotations: Importiert am 06. 03. 2022: Bauteil "AW15b\_" aus Gebäude ""

<sup>1</sup> layer is OI-relevant from BG2

16. 05. 2022, Qiming SUN (Tianjin University)

## List of materials

| material                                                        | mass<br>kg | mass-<br>percentage | cumulated<br>percentage | Building<br>material ID | Density<br>kg/m³ | λ-<br>Value<br>W/m²K | PENRT<br>MJ/FU<br>(functional<br>unit) | GWP-total<br>kg CO₂ equ./FU<br>(functional unit) | AP<br>kg SO₂ equ./FU<br>(functional unit) | FU<br>(functional<br>unit) |
|-----------------------------------------------------------------|------------|---------------------|-------------------------|-------------------------|------------------|----------------------|----------------------------------------|--------------------------------------------------|-------------------------------------------|----------------------------|
| KLH® - CLT                                                      | 565.731    | 67,6%               | 67,6%                   | 2142715713              | 475              | 0,120                | 7,46                                   | -1,10                                            | 0,00226                                   | kg                         |
| Rigips Feuerschutzplatte                                        | 152.037    | 18,2%               | 85,8%                   | 2142711094              | 810              | 0,250                | 3,09                                   | 0,157                                            | 0,000399                                  | kg                         |
| Mineral thermal insulating panel (93 kg/m³)                     | 49.998     | 6,0%                | 91,7%                   | 2142715044              | 93               | 0,041                | 12,3                                   | 1,01                                             | 0,00214                                   | kg                         |
| Timber (525 kg/m³ - e.g. larch) - rough, technically dried      | 32.311     | 3,9%                | 95,6%                   | 2142715293              | 525              | 0,130                | 2,77                                   | -1,65                                            | 0,00104                                   | kg                         |
| MDF panels semi-dense fibreboard (400 kg/m³)                    | 25.569     | 3,1%                | 98,6%                   | 2142715125              | 400              | 0,100                | 11,1                                   | -1,04                                            | 0,00413                                   | kg                         |
| Timber (475 kg/m³ - e.g. spruce/fir) - rough, technically dried | 7.369      | 0,9%                | 99,5%                   | 2142715290              | 475              | 0,120                | 2,52                                   | -1,50                                            | 0,000944                                  | kg                         |
| Sheep's wool - insulation felt (18 kg/m³)                       | 2.380      | 0,3%                | 99,8%                   | 2142715068              | 18               |                      | 19,7                                   | 0,537                                            | 0,00412                                   | kg                         |
| Polyethylene (PE) sealing sheeting                              | 916        | 0,1%                | 99,9%                   | 2142712507              | 980              | 0,500                | 69,8                                   | 2,10                                             | 0,00792                                   | kg                         |
| Bauder TEC KSD, Bauder TEC KSD DUO                              | 514        | 0,1%                | 100,0%                  | 2142732461              | 1.150            | 0,170                | 41,6                                   | 0,819                                            | 0,00556                                   | kg                         |
| Sisalex™ 30                                                     | 152        | 0,0%                | 100,0%                  | 2142684992              | 800              | 0,180                | 14,2                                   | -0,953                                           | 0,00589                                   | kg                         |
| Vertical air layer, heat flow down 26 < d ≤ 30 mm               | 48         | 0,0%                | 100,0%                  | 2142684539              | 1                | 0,146                | 0,00                                   | 0,00                                             | 0,00                                      | kg                         |
| Vertical air layer, heat flow down 16 < d ≤ 20 mm               | 5          | 0,0%                | 100,0%                  | 2142684541              | 1                | 0,105                | 0,00                                   | 0,00                                             | 0,00                                      | kg                         |
