# Supplementary material
Source: MDPI journal article supplement (https://www.mdpi.com/2071-1050/14/10/6174)
Supplement: s1 [file s1]

# Ol3 Statement

Result sheet building – new building

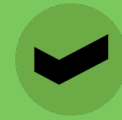

www.baubook.at/eco2soft  
Ökobilanz für Gebäude

Project name: copy of CLT

## building overall

|                            |                                                                           |                                   |                                                                             |
|----------------------------|---------------------------------------------------------------------------|-----------------------------------|-----------------------------------------------------------------------------|
| <b>*Ol3 BG3 ref. Area:</b> | 142 points                                                                | <b>GFA:</b>                       | 3.000 m <sup>2</sup>                                                        |
| <b>EI10:</b>               | 13,45 points                                                              | <b>ref. area<sub>Ol</sub>:</b>    | 3.000 m <sup>2</sup>                                                        |
| <b>PENRT:</b>              | 2.521 MJ / (m <sup>2</sup> ref. area <sub>Ol</sub> )                      | <b>catalog of LCA indicators:</b> | IBO benchmarks 2012                                                         |
| <b>GWP-total:</b>          | -174 kg CO <sub>2</sub> equ. / (m <sup>2</sup> ref. area <sub>Ol</sub> )  | <b>useful life considered:</b>    | yes, replacements rates with whole numbers (according to EN 15804 standard) |
| <b>AP:</b>                 | 0,652 kg SO <sub>2</sub> equ. / (m <sup>2</sup> ref. area <sub>Ol</sub> ) | <b>study period:</b>              | 100 years                                                                   |
| <b>Guide version Ol3:</b>  | V4.0 (September 2018)                                                     | <b>service life catalog:</b>      | 2018                                                                        |
| <b>Guide version EI10:</b> | V2, 2018                                                                  |                                   |                                                                             |

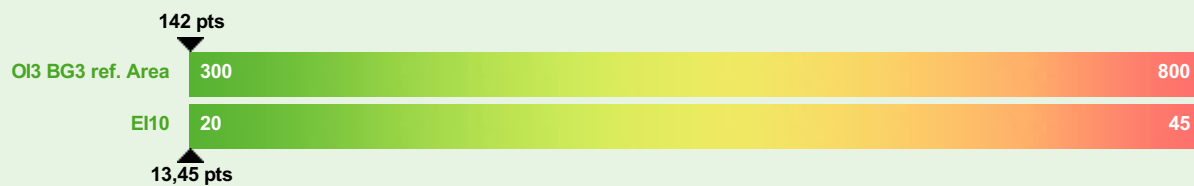

\* Taking into account the manufacturing phase (A1-A3) and the use phase (B1-B4) of EN 15804

test- and educational-version. not for commercial use!

→ subscribe to full version (with costs)

## components from the energy certificate

|                         |                  | <b>ΔOl3</b>    |                    | <b>PENRT</b> | <b>GWP-total</b>        | <b>AP</b>               | <b>EI<sub>KON</sub></b> |
|-------------------------|------------------|----------------|--------------------|--------------|-------------------------|-------------------------|-------------------------|
| quantity                | building element | BG3, ref. Area | per m <sup>2</sup> | MJ           | kg CO <sub>2</sub> equ. | kg SO <sub>2</sub> equ. | per m <sup>2</sup>      |
| 1.715,00 m <sup>2</sup> | F1_F1-8_in       | 48             | 85                 | 840          | -60                     | 0,228                   | 0,69                    |
| 190,00 m <sup>2</sup>   | F2_F1-8_ex       | 4              | 56                 | 65           | -8                      | 0,021                   | 0,15                    |
| 268,00 m <sup>2</sup>   | R1               | 11             | 124                | 199          | -5                      | 0,039                   | 0,85                    |
| 30,00 m <sup>2</sup>    | R2               | 0              | 48                 | 10           | -1                      | 0,003                   | 0,07                    |
| 212,00 m <sup>2</sup>   | W1_F1_L_ex       | 6              | 79                 | 93           | -4                      | 0,023                   | 0,83                    |
| 178,00 m <sup>2</sup>   | W2_F1_L_in       | 4              | 65                 | 74           | -7                      | 0,019                   | 0,82                    |
| 1.035,00 m <sup>2</sup> | W3_F2-8_L_ex1    | 27             | 78                 | 448          | -17                     | 0,111                   | 0,84                    |
| 219,00 m <sup>2</sup>   | W4_F2-8_L_ex2    | 4              | 51                 | 76           | -11                     | 0,023                   | 0,53                    |
| 77,00 m <sup>2</sup>    | W5_F2-8_L_ex3    | 2              | 76                 | 33           | -2                      | 0,009                   | 0,76                    |
| 925,00 m <sup>2</sup>   | W6_F2-8_L_in     | 19             | 62                 | 361          | -33                     | 0,094                   | 0,81                    |
| 211,00 m <sup>2</sup>   | W7_F1-8_L_in     | 5              | 66                 | 77           | -2                      | 0,018                   | 0,79                    |
| <b>sum</b>              |                  |                |                    | <b>2.276</b> | <b>-150</b>             | <b>0,588</b>            |                         |

## interior walls

|                       |                  | <b>ΔOl3</b>    |                    | <b>PENRT</b> | <b>GWP-total</b>        | <b>AP</b>               | <b>EI<sub>KON</sub></b> |
|-----------------------|------------------|----------------|--------------------|--------------|-------------------------|-------------------------|-------------------------|
| quantity              | building element | BG3, ref. Area | per m <sup>2</sup> | MJ           | kg CO <sub>2</sub> equ. | kg SO <sub>2</sub> equ. | per m <sup>2</sup>      |
| 538,00 m <sup>2</sup> | stair            | 2              | 10                 | 38           | -5,5                    | 0,0114                  | 0,01                    |
| 406,00 m <sup>2</sup> | W8_F1-8_N_in     | 6              | 43                 | 111          | -9,4                    | 0,0276                  | 0,34                    |
| 303,00 m <sup>2</sup> | W9_F1-8_N_in     | 5              | 50                 | 97           | -9,1                    | 0,0250                  | 0,35                    |
| <b>sum</b>            |                  |                |                    | <b>245</b>   | <b>-24,1</b>            | <b>0,0640</b>           |                         |

test- and educational-version. not for commercial use!

→ subscribe to full version (with costs)

## graphic details of solid and transparent building elements

## Project name: copy of CLT

### F1\_F1-8\_in (components from the energy certificate, BG3)

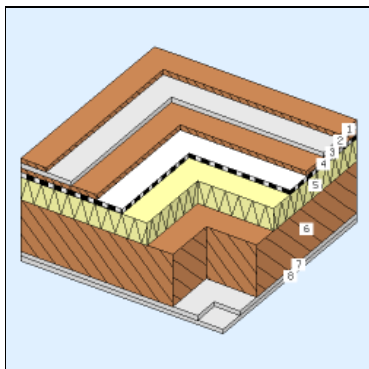

**ΣΔOI3:** 85 points/m<sup>2</sup>

**El<sub>KON</sub>:** 0,69 points/m<sup>2</sup>

**mass:** 164,6 kg/m<sup>2</sup>

**PENRT:** 1.469 MJ/m<sup>2</sup>

**GWP-total:** -104 kg CO<sub>2</sub> equ./m<sup>2</sup>

**AP:** 0,399 kg SO<sub>2</sub> equ./m<sup>2</sup>

**service life:** yes, replacements rates with whole numbers (according to EN 15804 standard)

| no. layer                                                                                                          | d <sub>cm</sub> | Useful life >b  | ΔOI3<br>pts/m <sup>2</sup> | Disposal-<br>classification | Exploitation<br>potential |
|--------------------------------------------------------------------------------------------------------------------|-----------------|-----------------|----------------------------|-----------------------------|---------------------------|
| 1 Trittschalldämmung (Isover Akustic EP3) (Timber (525 kg/m <sup>3</sup> - e.g. larch) - rough, technically drier) | 1,30            | 50              | 1                          | 1                           | 1                         |
| 2 Rigidur Estrichelement (Rigips Feuerschutzplatte)                                                                | 1,25            | 50              | 4                          | 4                           | 3                         |
| 3 Splittschüttung gebunden (MDF panels semi-dense fibreboard (400 kg/m <sup>3</sup> ))                             | 2,20            | 50              | 16                         | 3                           | 3                         |
| 4 Rieselschutz (Sisalex™ 30)                                                                                       | 0,01            | <sup>1</sup> 50 | <sup>2</sup> 0             | 3                           | 3                         |
| 5 Brettsperrholz BBS (5-lagig) (Mineral thermal insulating panel (93 kg/m <sup>3</sup> ))                          | 10,00           | 50              | 16                         | 2                           | 3                         |
| 6 schallentkoppelte U-Direktabhängiger mit Rigips CD Profil / Mineralwolle (z. B. Isover Trennwand Filz)           | 23,00           | 100             | 40                         | 1                           | 1                         |
| 7 Rigips Feuerschutzplatte                                                                                         | 1,25            | 50              | 4                          | 4                           | 3                         |
| 8 Rigips Feuerschutzplatte                                                                                         | 1,25            | 50              | 4                          | 4                           | 3                         |
| <b>building element</b>                                                                                            | <b>40,26</b>    |                 |                            |                             |                           |

**annotations:** Importiert am 06. 03. 2022: Bauteil "DE06e\_" aus Gebäude ""

<sup>1</sup> self-entered value <sup>2</sup> layer is OI-relevant from BG1

16. 05. 2022, Qiming SUN (Tianjin University)

## Project name: copy of CLT

### F2\_F1-8\_ex (components from the energy certificate, BG3)

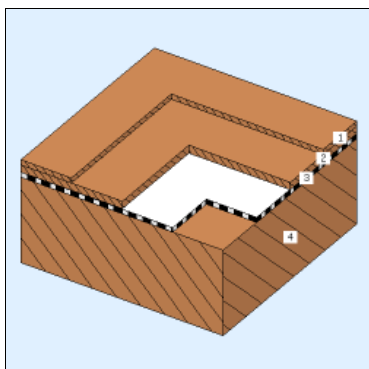

**ΣΔOI3:** 56 points/m<sup>2</sup>

**El<sub>KON</sub>:** 0,15 points/m<sup>2</sup>

**mass:** 124,2 kg/m<sup>2</sup>

**PENRT:** 1.034 MJ/m<sup>2</sup>

**GWP-total:** -134 kg CO<sub>2</sub> equ./m<sup>2</sup>

**AP:** 0,328 kg SO<sub>2</sub> equ./m<sup>2</sup>

**service life:** yes, replacements rates with whole numbers (according to EN 15804 standard)

| no. layer                                                                                                          | d <sub>cm</sub> | Useful life >b  | ΔOI3<br>pts/m <sup>2</sup> | Disposal-<br>classification | Exploitation<br>potential |
|--------------------------------------------------------------------------------------------------------------------|-----------------|-----------------|----------------------------|-----------------------------|---------------------------|
| 1 Trittschalldämmung (Isover Akustic EP3) (Timber (525 kg/m <sup>3</sup> - e.g. larch) - rough, technically drier) | 1,30            | 50              | 1                          | 1                           | 1                         |
| 2 Splittschüttung gebunden (MDF panels semi-dense fibreboard (400 kg/m <sup>3</sup> ))                             | 2,00            | 50              | 14                         | 3                           | 3                         |
| 3 Rieselschutz (Sisalex™ 30)                                                                                       | 0,01            | <sup>1</sup> 50 | <sup>2</sup> 0             | 3                           | 3                         |
| 4 schallentkoppelte U-Direktabhängiger mit Rigips CD Profil / Mineralwolle (z. B. Isover Trennwand Filz)           | 23,00           | 100             | 40                         | 1                           | 1                         |
| <b>building element</b>                                                                                            | <b>26,31</b>    |                 |                            |                             |                           |

**annotations:** Importiert am 06. 03. 2022: Bauteil "DE06e\_" aus Gebäude ""

<sup>1</sup> self-entered value <sup>2</sup> layer is OI-relevant from BG1

16. 05. 2022, Qiming SUN (Tianjin University)

## Project name: copy of CLT

### R1 (components from the energy certificate, BG3)

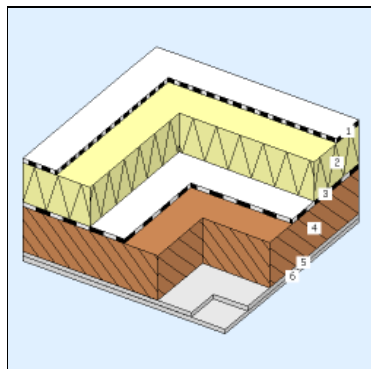

$\Sigma \Delta OI3$ : 124 points/m<sup>2</sup>  
 $El_{kon}$ : 0,85 points/m<sup>2</sup>  
 mass: 152,3 kg/m<sup>2</sup>  
 $PENRT$ : 2.227 MJ/m<sup>2</sup>  
 $GWP$ -total: -52,6 kg CO<sub>2</sub> equ./m<sup>2</sup>  
 $AP$ : 0,440 kg SO<sub>2</sub> equ./m<sup>2</sup>  
 service life: yes, replacements rates with whole numbers (according to EN 15804 standard)

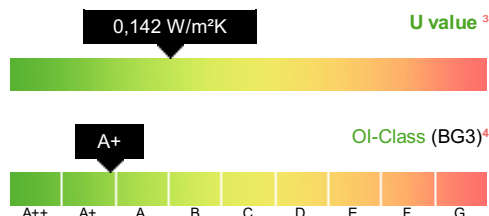

| no. layer                                                                                              | d<br>cm      | Useful life >b  | $\Delta OI3$<br>pts/m <sup>2</sup> | Disposal-<br>classification | Exploitation<br>potential |
|--------------------------------------------------------------------------------------------------------|--------------|-----------------|------------------------------------|-----------------------------|---------------------------|
| 1 gewebearmierte Kunststoff-Schweißbahn (>1,7 kg/m <sup>2</sup> ) (Polyethylene (PE) sealing sheeting) | 0,25         | 25              | <sup>1</sup> 37                    | 3                           | 4                         |
| 2 Expandiertes Polystyrol (Gefälledämmung) (Mineral thermal insulating panel (93 kg/m <sup>3</sup> ))  | 20,00        | 50              | 32                                 | 2                           | 3                         |
| 3 Abdichtungsbahn (sd=220m) (Bauder TEC KSD, Bauder TEC KSD DUO)                                       | 0,15         | <sup>2</sup> 50 | <sup>1</sup> 8                     | 3                           | 5                         |
| 4 Brettsperrholz BBS (5-lagig) (KLH® - CLT)                                                            | 23,00        | 100             | 40                                 | 1                           | 1                         |
| 5 Brettsperrholz BBS (5-lagig) (Rigips Feuerschutzplatte)                                              | 1,25         | 50              | 4                                  | 4                           | 3                         |
| 6 Brettsperrholz BBS (5-lagig) (Rigips Feuerschutzplatte)                                              | 1,25         | 50              | 4                                  | 4                           | 3                         |
| <b>building element</b>                                                                                | <b>45,90</b> |                 |                                    |                             |                           |

annotations: Importiert am 06. 03. 2022: Bauteil "DA05a\_" aus Gebäude ""

<sup>1</sup> layer is OI-relevant from BG1 <sup>2</sup> self-entered value <sup>3</sup> U value (Heat transfer coefficient) calculated according to ÖNORM EN ISO 6946. <sup>4</sup> For the OI class, the U-value of the component is taken into account in addition to the ecological key figures

16. 05. 2022, Qiming SUN (Tianjin University)

## Project name: copy of CLT

### R2 (components from the energy certificate, BG3)

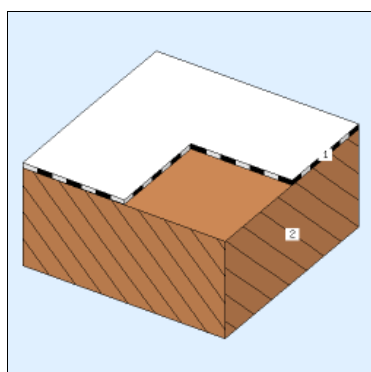

$\Sigma \Delta OI3$ : 48 points/m<sup>2</sup>  
 $El_{kon}$ : 0,07 points/m<sup>2</sup>  
 mass: 111,0 kg/m<sup>2</sup>  
 $PENRT$ : 959 MJ/m<sup>2</sup>  
 $GWP$ -total: -118 kg CO<sub>2</sub> equ./m<sup>2</sup>  
 $AP$ : 0,266 kg SO<sub>2</sub> equ./m<sup>2</sup>  
 service life: yes, replacements rates with whole numbers (according to EN 15804 standard)

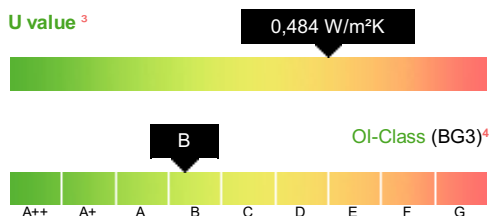

| no. layer                                                        | d<br>cm      | Useful life >b  | $\Delta OI3$<br>pts/m <sup>2</sup> | Disposal-<br>classification | Exploitation<br>potential |
|------------------------------------------------------------------|--------------|-----------------|------------------------------------|-----------------------------|---------------------------|
| 1 Abdichtungsbahn (sd=220m) (Bauder TEC KSD, Bauder TEC KSD DUO) | 0,15         | <sup>1</sup> 50 | <sup>2</sup> 8                     | 3                           | 5                         |
| 2 Brettsperrholz BBS (5-lagig) (KLH® - CLT)                      | 23,00        | 100             | 40                                 | 1                           | 1                         |
| <b>building element</b>                                          | <b>23,15</b> |                 |                                    |                             |                           |

annotations: Importiert am 06. 03. 2022: Bauteil "DA05a\_" aus Gebäude ""

<sup>1</sup> self-entered value <sup>2</sup> layer is OI-relevant from BG1 <sup>3</sup> U value (Heat transfer coefficient) calculated according to ÖNORM EN ISO 6946. <sup>4</sup> For the OI class, the U-value of the component is taken into account in addition to the ecological key figures

16. 05. 2022, Qiming SUN (Tianjin University)

## Project name: copy of CLT

### W1\_F1\_L\_ex (components from the energy certificate, BG3)

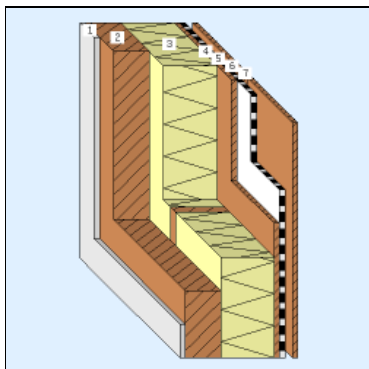

$\Sigma \Delta OI3$ : 79 points/m<sup>2</sup>

$E_{I_{KON}}$ : 0,83 points/m<sup>2</sup>

mass: 120,3 kg/m<sup>2</sup>

PENRT: 1.321 MJ/m<sup>2</sup>

GWP-total: -56,5 kg CO<sub>2</sub> equ./m<sup>2</sup>

AP: 0,331 kg SO<sub>2</sub> equ./m<sup>2</sup>

service life: yes, replacements rates with whole numbers (according to EN 15804 standard)

0,149 W/m<sup>2</sup>K

U value <sup>2</sup>

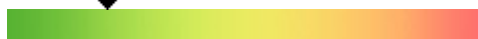

A+

OI-Class (BG3) <sup>3</sup>

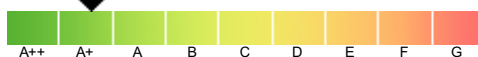

| no. layer (from inside to outside)                                                                           | d<br>cm      | Useful life >b | $\Delta OI3$<br>pts/m <sup>2</sup> | Disposal-<br>classification | Exploitation<br>potential |
|--------------------------------------------------------------------------------------------------------------|--------------|----------------|------------------------------------|-----------------------------|---------------------------|
| 1 Rigips Feuerschutzplatte ( <i>Rigips Feuerschutzplatte</i> )                                               | 1,25         | 50             | 4                                  | 4                           | 3                         |
| 2 Brettsperrholz BBS (3-lagig) ( <i>KLH® - CLT</i> )                                                         | 14,50        | 100            | 25                                 | 1                           | 1                         |
| 3 <i>inhomogeneous (parts vertical)</i>                                                                      | 22,00        |                |                                    |                             |                           |
| 115 cm (96%) Mineral thermal insulating panel (93 kg/m <sup>3</sup> )                                        | 22,00        | 50             | 34                                 | 2                           | 3                         |
| 5 cm (4%) Timber (475 kg/m <sup>3</sup> - e.g. spruce/fir) - rough, technically dried                        | 22,00        | 100            | 0                                  | 1                           | 1                         |
| 4 MDF panels semi-dense fibreboard (400 kg/m <sup>3</sup> )                                                  | 1,50         | 50             | 11                                 | 3                           | 3                         |
| 5 Unterspännbahn ( <i>Polyethylene (PE) sealing sheeting</i> )                                               | 0,02         | 25             | <sup>1</sup> 3                     | 3                           | 4                         |
| 6 <i>inhomogeneous (parts vertical)</i>                                                                      | 3,00         |                |                                    |                             |                           |
| 115 cm (96%) Vertical air layer, heat flow down 26 < d ≤ 30 mm                                               | 3,00         |                | <sup>1</sup> 0                     | 0                           | 0                         |
| 5 cm (4%) Timber (475 kg/m <sup>3</sup> - e.g. spruce/fir) - rough, technically dried                        | 3,00         | 50             | <sup>1</sup> 0                     | 1                           | 1                         |
| 7 Holz Außenwandverkleidung ( <i>Timber (525 kg/m<sup>3</sup> - e.g. larch) - rough, technically dried</i> ) | 2,00         | 50             | <sup>1</sup> 2                     | 1                           | 1                         |
| <b>building element</b>                                                                                      | <b>44,27</b> |                |                                    |                             |                           |

annotations: Importiert am 01. 03. 2022: Bauteil "AW10d\_" aus Gebäude ""

<sup>1</sup> layer is OI-relevant from BG1 <sup>2</sup> U value (Heat transfer coefficient) calculated according to ÖNORM EN ISO 6946. <sup>3</sup> For the OI class, the U-value of the component is taken into account in addition to the ecological key figures

16. 05. 2022, Qiming SUN (Tianjin University)

Project name: copy of CLT

W2\_F1\_L\_in (components from the energy certificate, BG3)

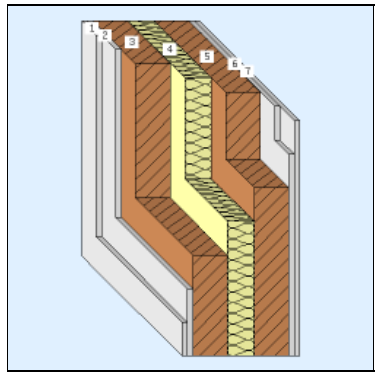

$\Sigma \Delta OI3$ : 65 points/m<sup>2</sup>  
 $E_{l_{kon}}$ : 0,82 points/m<sup>2</sup>  
**mass**: 165,8 kg/m<sup>2</sup>  
**PENRT**: 1.243 MJ/m<sup>2</sup>  
**GWP-total**: -117 kg CO<sub>2</sub> equ./m<sup>2</sup>  
**AP**: 0,327 kg SO<sub>2</sub> equ./m<sup>2</sup>  
**service life**: yes, replacements rates with whole numbers (according to EN 15804 standard)

| no.              | layer (from inside to outside)                         | d<br>cm | Useful life >b | $\Delta OI3$<br>pts/m <sup>2</sup> | Disposal-<br>classification | Exploitation<br>potential |
|------------------|--------------------------------------------------------|---------|----------------|------------------------------------|-----------------------------|---------------------------|
| 1                | Rigips Feuerschutzplatte                               | 1,25    | 50             | <sup>1</sup> 4                     | 4                           | 3                         |
| 2                | Rigips Feuerschutzplatte                               | 1,25    | 50             | <sup>1</sup> 4                     | 4                           | 3                         |
| 3                | Brettsper Holz BBS (3-lagig) (KLH® - CLT)              | 13,00   | 100            | <sup>1</sup> 23                    | 1                           | 1                         |
| 4                | Sheep's wool - insulation felt (18 kg/m <sup>3</sup> ) | 10,00   | 50             | <sup>1</sup> 5                     | 3                           | 3                         |
| 5                | Brettsper Holz BBS (3-lagig) (KLH® - CLT)              | 13,00   | 100            | <sup>1</sup> 23                    | 1                           | 1                         |
| 6                | Rigips Feuerschutzplatte                               | 1,25    | 50             | <sup>1</sup> 4                     | 4                           | 3                         |
| 7                | Rigips Feuerschutzplatte                               | 1,25    | 50             | <sup>1</sup> 4                     | 4                           | 3                         |
| building element |                                                        | 41,00   |                |                                    |                             |                           |

annotations: Importiert am 06. 03. 2022: Bauteil "IW11b\_" aus Gebäude ""  
<sup>1</sup> layer is OI-relevant from BG3

16. 05. 2022, Qiming SUN (Tianjin University)

## Project name: copy of CLT

### W3\_F2-8\_L\_ex1 (components from the energy certificate, BG3)

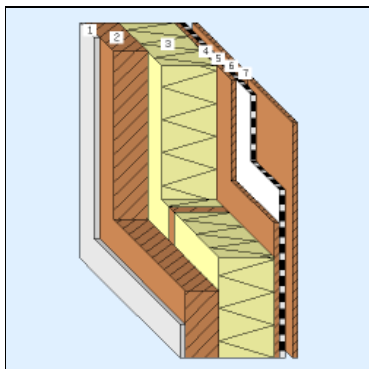

$\Sigma \Delta OI3$ : 78 points/m<sup>2</sup>  
 $E_{I_{KON}}$ : 0,84 points/m<sup>2</sup>  
**mass**: 117,6 kg/m<sup>2</sup>  
**PENRT**: 1.298 MJ/m<sup>2</sup>  
**GWP-total**: -50,5 kg CO<sub>2</sub> equ./m<sup>2</sup>  
**AP**: 0,321 kg SO<sub>2</sub> equ./m<sup>2</sup>  
**service life**: yes, replacements rates with whole numbers (according to EN 15804 standard)

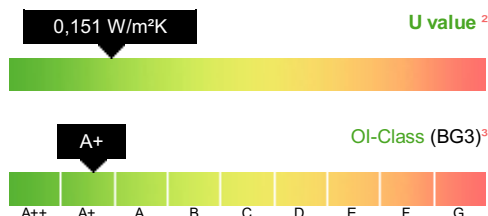

| no. layer (from inside to outside)                                                                   | d<br>cm      | Useful life >b | $\Delta OI3$<br>pts/m <sup>2</sup> | Disposal-<br>classification | Exploitation<br>potential |
|------------------------------------------------------------------------------------------------------|--------------|----------------|------------------------------------|-----------------------------|---------------------------|
| 1 Rigips Feuerschutzplatte (Rigips Feuerschutzplatte)                                                | 1,50         | 50             | 5                                  | 4                           | 3                         |
| 2 Brettsperrholz BBS (3-lagig) (KLH® - CLT)                                                          | 13,50        | 100            | 24                                 | 1                           | 1                         |
| 3 inhomogeneous (parts vertical)                                                                     | 22,00        |                |                                    |                             |                           |
| 115 cm (96%) Mineral thermal insulating panel (93 kg/m <sup>3</sup> )                                | 22,00        | 50             | 34                                 | 2                           | 3                         |
| 5 cm (4%) Timber (475 kg/m <sup>3</sup> - e.g. spruce/fir) - rough, technically dried                | 22,00        | 100            | 0                                  | 1                           | 1                         |
| 4 MDF panels semi-dense fibreboard (400 kg/m <sup>3</sup> )                                          | 1,50         | 50             | 11                                 | 3                           | 3                         |
| 5 Unterspännbahn (Polyethylene (PE) sealing sheeting)                                                | 0,02         | 25             | 3                                  | 3                           | 4                         |
| 6 inhomogeneous (parts vertical)                                                                     | 3,00         |                |                                    |                             |                           |
| 115 cm (96%) Vertical air layer, heat flow down 26 < d <= 30 mm                                      | 3,00         |                | 0                                  | 0                           | 0                         |
| 5 cm (4%) Timber (475 kg/m <sup>3</sup> - e.g. spruce/fir) - rough, technically dried                | 3,00         | 50             | 0                                  | 1                           | 1                         |
| 7 Holz Außenwandverkleidung (Timber (525 kg/m <sup>3</sup> - e.g. larch) - rough, technically dried) | 2,00         | 50             | 2                                  | 1                           | 1                         |
| <b>building element</b>                                                                              | <b>43,52</b> |                |                                    |                             |                           |

annotations: Importiert am 01. 03. 2022: Bauteil "AW10d\_" aus Gebäude ""

<sup>1</sup> layer is OI-relevant from BG1 <sup>2</sup> U value (Heat transfer coefficient) calculated according to ÖNORM EN ISO 6946. <sup>3</sup> For the OI class, the U-value of the component is taken into account in addition to the ecological key figures

16. 05. 2022, Qiming SUN (Tianjin University)

## Project name: copy of CLT

### W4\_F2-8\_L\_ex2 (components from the energy certificate, BG3)

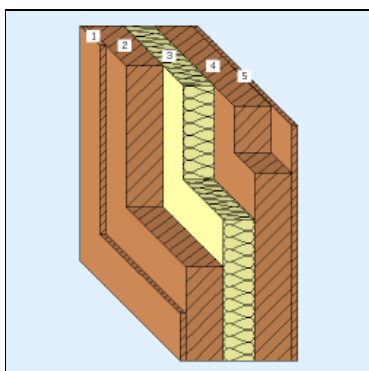

$\Sigma \Delta OI3$ : 51 points/m<sup>2</sup>  
 $E_{I_{KON}}$ : 0,53 points/m<sup>2</sup>  
**mass**: 136,8 kg/m<sup>2</sup>  
**PENRT**: 1.038 MJ/m<sup>2</sup>  
**GWP-total**: -152 kg CO<sub>2</sub> equ./m<sup>2</sup>  
**AP**: 0,316 kg SO<sub>2</sub> equ./m<sup>2</sup>  
**service life**: yes, replacements rates with whole numbers (according to EN 15804 standard)

| no. layer (from inside to outside)                                       | d<br>cm      | Useful life >b | $\Delta OI3$<br>pts/m <sup>2</sup> | Disposal-<br>classification | Exploitation<br>potential |
|--------------------------------------------------------------------------|--------------|----------------|------------------------------------|-----------------------------|---------------------------|
| 1 Timber (525 kg/m <sup>3</sup> - e.g. larch) - rough, technically dried | 2,00         | 50             | 2                                  | 1                           | 1                         |
| 2 Brettsperrholz BBS (3-lagig) (KLH® - CLT)                              | 12,00        | 100            | 21                                 | 1                           | 1                         |
| 3 Sheep's wool - insulation felt (18 kg/m <sup>3</sup> )                 | 10,00        | 50             | 5                                  | 3                           | 3                         |
| 4 Brettsperrholz BBS (3-lagig) (KLH® - CLT)                              | 12,00        | 100            | 21                                 | 1                           | 1                         |
| 5 Timber (525 kg/m <sup>3</sup> - e.g. larch) - rough, technically dried | 2,00         | 50             | 2                                  | 1                           | 1                         |
| <b>building element</b>                                                  | <b>38,00</b> |                |                                    |                             |                           |

annotations: Importiert am 06. 03. 2022: Bauteil "IW11b\_" aus Gebäude ""

<sup>1</sup> layer is OI-relevant from BG3

16. 05. 2022, Qiming SUN (Tianjin University)

## Project name: copy of CLT

### W5\_F2-8\_L\_ex3 (components from the energy certificate, BG3)

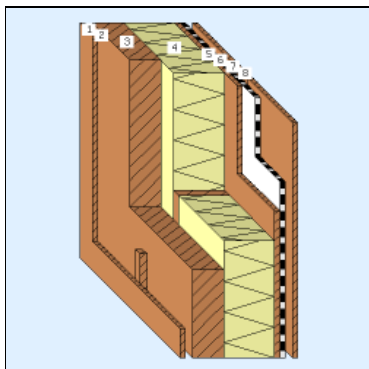

$\Sigma \Delta OI3$ : 76 points/m<sup>2</sup>

$E_{l_{KON}}$ : 0,76 points/m<sup>2</sup>

mass: 116,5 kg/m<sup>2</sup>

PENRT: 1.284 MJ/m<sup>2</sup>

GWP-total: -71,2 kg CO<sub>2</sub> equ./m<sup>2</sup>

AP: 0,335 kg SO<sub>2</sub> equ./m<sup>2</sup>

service life: yes, replacements rates with whole numbers (according to EN 15804 standard)

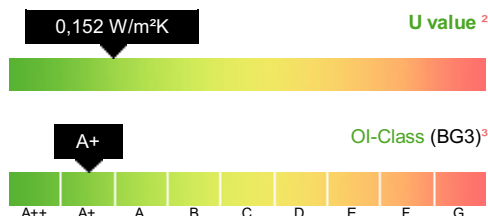

| no. layer (from inside to outside)                                                                   | d<br>cm      | Useful life >b | $\Delta OI3$<br>pts/m <sup>2</sup> | Disposal-<br>classification | Exploitation<br>potential |
|------------------------------------------------------------------------------------------------------|--------------|----------------|------------------------------------|-----------------------------|---------------------------|
| 1 Holz Außenwandverkleidung (Timber (525 kg/m <sup>3</sup> - e.g. larch) - rough, technically dried) | 2,00         | 50             | <sup>1</sup> 2                     | 1                           | 1                         |
| 2 inhomogeneous (parts vertical)                                                                     | 3,00         |                |                                    |                             |                           |
| 115 cm (96%) Vertical air layer, heat flow down 26 < d <= 30 mm                                      | 3,00         |                | <sup>1</sup> 0                     | 0                           | 0                         |
| 5 cm (4%) Timber (475 kg/m <sup>3</sup> - e.g. spruce/fir) - rough, technically dried                | 3,00         | 50             | <sup>1</sup> 0                     | 1                           | 1                         |
| 3 Brettsperrholz BBS (3-lagig) (KLH® - CLT)                                                          | 13,50        | 100            | 24                                 | 1                           | 1                         |
| 4 inhomogeneous (parts vertical)                                                                     | 22,00        |                |                                    |                             |                           |
| 115 cm (96%) Mineral thermal insulating panel (93 kg/m <sup>3</sup> )                                | 22,00        | 50             | 34                                 | 2                           | 3                         |
| 5 cm (4%) Timber (475 kg/m <sup>3</sup> - e.g. spruce/fir) - rough, technically dried                | 22,00        | 100            | 0                                  | 1                           | 1                         |
| 5 MDF panels semi-dense fibreboard (400 kg/m <sup>3</sup> )                                          | 1,50         | 50             | 11                                 | 3                           | 3                         |
| 6 Unterspannbahn (Polyethylene (PE) sealing sheeting)                                                | 0,02         | 25             | <sup>1</sup> 3                     | 3                           | 4                         |
| 7 inhomogeneous (parts vertical)                                                                     | 3,00         |                |                                    |                             |                           |
| 115 cm (96%) Vertical air layer, heat flow down 26 < d <= 30 mm                                      | 3,00         |                | <sup>1</sup> 0                     | 0                           | 0                         |
| 5 cm (4%) Timber (475 kg/m <sup>3</sup> - e.g. spruce/fir) - rough, technically dried                | 3,00         | 50             | <sup>1</sup> 0                     | 1                           | 1                         |
| 8 Holz Außenwandverkleidung (Timber (525 kg/m <sup>3</sup> - e.g. larch) - rough, technically dried) | 2,00         | 50             | <sup>1</sup> 2                     | 1                           | 1                         |
| <b>building element</b>                                                                              | <b>47,02</b> |                |                                    |                             |                           |

annotations: Importiert am 01. 03. 2022: Bauteil "AW10d\_" aus Gebäude ""

<sup>1</sup> layer is OI-relevant from BG1

<sup>2</sup> U value (Heat transfer coefficient) calculated according to ÖNORM EN ISO 6946.

<sup>3</sup> For the OI class, the U-value of the component is taken into account in addition to the ecological key figures

16. 05. 2022, Qiming SUN (Tianjin University)

Project name: copy of CLT

W6\_F2-8\_L\_in (components from the energy certificate, BG3)

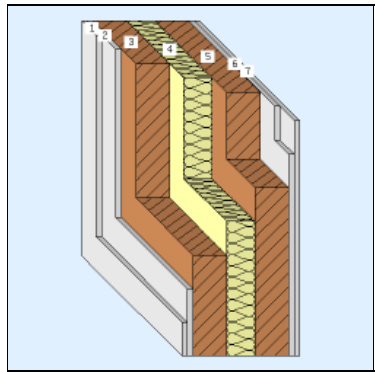

$\Sigma \Delta OI3$ : 62 points/m<sup>2</sup>  
 $E_{l_{kon}}$ : 0,81 points/m<sup>2</sup>  
**mass**: 156,3 kg/m<sup>2</sup>  
**PENRT**: 1.172 MJ/m<sup>2</sup>  
**GWP-total**: -107 kg CO<sub>2</sub> equ./m<sup>2</sup>  
**AP**: 0,305 kg SO<sub>2</sub> equ./m<sup>2</sup>  
**service life**: yes, replacements rates with whole numbers (according to EN 15804 standard)

| no. layer (from inside to outside)                       | d <sub>cm</sub> | Useful life >b | $\Delta OI3$<br>pts/m <sup>2</sup> | Disposal-<br>classification | Exploitation<br>potential |
|----------------------------------------------------------|-----------------|----------------|------------------------------------|-----------------------------|---------------------------|
| 1 Rigips Feuerschutzplatte                               | 1,25            | 50             | <sup>1</sup> 4                     | 4                           | 3                         |
| 2 Rigips Feuerschutzplatte                               | 1,25            | 50             | <sup>1</sup> 4                     | 4                           | 3                         |
| 3 Brettsperrholz BBS (3-lagig) (KLH® - CLT)              | 12,00           | 100            | <sup>1</sup> 21                    | 1                           | 1                         |
| 4 Sheep's wool - insulation felt (18 kg/m <sup>3</sup> ) | 10,00           | 50             | <sup>1</sup> 5                     | 3                           | 3                         |
| 5 Brettsperrholz BBS (3-lagig) (KLH® - CLT)              | 12,00           | 100            | <sup>1</sup> 21                    | 1                           | 1                         |
| 6 Rigips Feuerschutzplatte                               | 1,25            | 50             | <sup>1</sup> 4                     | 4                           | 3                         |
| 7 Rigips Feuerschutzplatte                               | 1,25            | 50             | <sup>1</sup> 4                     | 4                           | 3                         |
| building element                                         | 39,00           |                |                                    |                             |                           |

annotations: Importiert am 06. 03. 2022: Bauteil "IW11b\_" aus Gebäude ""  
<sup>1</sup> layer is OI-relevant from BG3

16. 05. 2022, Qiming SUN (Tianjin University)



## Project name: copy of CLT

### W7\_F1-8\_L\_in (components from the energy certificate, BG3)

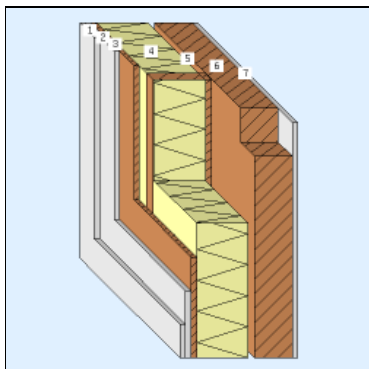

**$\Sigma \Delta OI3$ :** 66 points/m<sup>2</sup>  
 **$E_{kON}$ :** 0,79 points/m<sup>2</sup>  
**mass:** 110,6 kg/m<sup>2</sup>  
**PENRT:** 1.092 MJ/m<sup>2</sup>  
**GWP-total:** -29,8 kg CO<sub>2</sub> equ./m<sup>2</sup>  
**AP:** 0,259 kg SO<sub>2</sub> equ./m<sup>2</sup>  
**service life:** yes, replacements rates with whole numbers (according to EN 15804 standard)

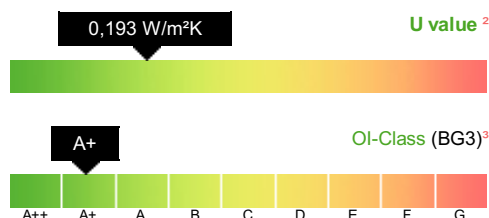

| no. layer (from inside to outside)                                                      | d<br>cm      | Useful life >b | $\Delta OI3$<br>pts/m <sup>2</sup> | Disposal-<br>classification | Exploitation<br>potential |
|-----------------------------------------------------------------------------------------|--------------|----------------|------------------------------------|-----------------------------|---------------------------|
| 1 Rigips Feuerschutzplatte (Rigips Feuerschutzplatte)                                   | 1,25         | 50             | 4                                  | 4                           | 3                         |
| 2 Rigips Feuerschutzplatte (Rigips Feuerschutzplatte)                                   | 1,25         | 50             | 4                                  | 4                           | 3                         |
| 3 Holz Außenwandverkleidung (MDF panels semi-dense fibreboard (400 kg/m <sup>3</sup> )) | 1,20         | 50             | <sup>1</sup> 9                     | 3                           | 3                         |
| 4 inhomogeneous (parts vertical)                                                        | 16,50        |                |                                    |                             |                           |
| 115 cm (96%) Mineral thermal insulating panel (93 kg/m <sup>3</sup> )                   | 16,50        | 50             | 25                                 | 2                           | 3                         |
| 5 cm (4%) Timber (475 kg/m <sup>3</sup> - e.g. spruce/fir) - rough, technically dried   | 16,50        | 100            | 0                                  | 1                           | 1                         |
| 5 inhomogeneous (parts vertical)                                                        | 2,00         |                |                                    |                             |                           |
| 115 cm (96%) Vertical air layer, heat flow down 16 < d ≤ 20 mm                          | 2,00         |                | <sup>1</sup> 0                     | 0                           | 0                         |
| 5 cm (4%) Timber (475 kg/m <sup>3</sup> - e.g. spruce/fir) - rough, technically dried   | 2,00         | 100            | <sup>1</sup> 0                     | 1                           | 1                         |
| 6 Brettsperrholz BBS (3-lagig) (KLH® - CLT)                                             | 12,00        | 100            | 21                                 | 1                           | 1                         |
| 7 Rigips Feuerschutzplatte (Rigips Feuerschutzplatte)                                   | 1,25         | 50             | 4                                  | 4                           | 3                         |
| <b>building element</b>                                                                 | <b>35,45</b> |                |                                    |                             |                           |

annotations: Importiert am 01. 03. 2022: Bauteil "AW10d\_" aus Gebäude ""

<sup>1</sup> layer is OI-relevant from BG1 <sup>2</sup> U value (Heat transfer coefficient) calculated according to ÖNORM EN ISO 6946. <sup>3</sup> For the OI class, the U-value of the component is taken into account in addition to the ecological key figures

16. 05. 2022, Qiming SUN (Tianjin University)

## Project name: copy of CLT

### stair (interior walls, BG3)

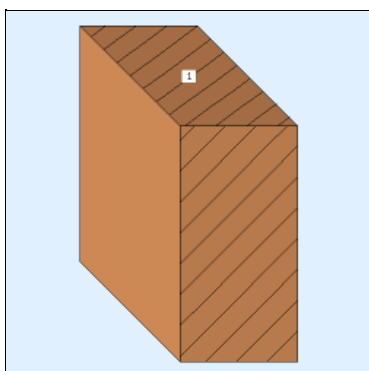

**$\Sigma \Delta OI3$ :** 10 points/m<sup>2</sup>  
 **$E_{kON}$ :** 0,01 points/m<sup>2</sup>  
**mass:** 28,0 kg/m<sup>2</sup>  
**PENRT:** 209 MJ/m<sup>2</sup>  
**GWP-total:** -30,9 kg CO<sub>2</sub> equ./m<sup>2</sup>  
**AP:** 0,0634 kg SO<sub>2</sub> equ./m<sup>2</sup>  
**service life:** yes, replacements rates with whole numbers (according to EN 15804 standard)

| no. layer (from inside to outside)          | d<br>cm     | Useful life >b | $\Delta OI3$<br>pts/m <sup>2</sup> | Disposal-<br>classification | Exploitation<br>potential |
|---------------------------------------------|-------------|----------------|------------------------------------|-----------------------------|---------------------------|
| 1 Brettsperrholz BBS (3-lagig) (KLH® - CLT) | 5,90        | 100            | <sup>1</sup> 10                    | 1                           | 1                         |
| <b>building element</b>                     | <b>5,90</b> |                |                                    |                             |                           |

annotations: Importiert am 06. 03. 2022: Bauteil "IW01b\_" aus Gebäude ""

<sup>1</sup> layer is OI-relevant from BG3

16. 05. 2022, Qiming SUN (Tianjin University)

## Project name: copy of CLT

### W8\_F1-8\_N\_in (interior walls, BG3)

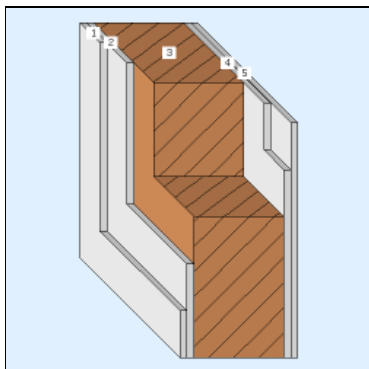

$\Sigma\Delta OI3$ : 43 points/m<sup>2</sup>

$E_{l_{kon}}$ : 0,34 points/m<sup>2</sup>

mass: 116,5 kg/m<sup>2</sup>

PENRT: 818 MJ/m<sup>2</sup>

GWP-total: -69,6 kg CO<sub>2</sub> equ./m<sup>2</sup>

AP: 0,204 kg SO<sub>2</sub> equ./m<sup>2</sup>

service life: yes, replacements rates with whole numbers (according to EN 15804 standard)

| no. layer (from inside to outside)                    | d<br>cm      | Useful life >b | $\Delta OI3$<br>pts/m <sup>2</sup> | Disposal-<br>classification | Exploitation<br>potential |
|-------------------------------------------------------|--------------|----------------|------------------------------------|-----------------------------|---------------------------|
| 1 Rigips Feuerschutzplatte (Rigips Feuerschutzplatte) | 1,25         | 50             | <sup>1</sup> 4                     | 4                           | 3                         |
| 2 Rigips Feuerschutzplatte (Rigips Feuerschutzplatte) | 1,25         | 50             | <sup>1</sup> 4                     | 4                           | 3                         |
| 3 Brettsperrholz BBS (3-lagig) (KLH® - CLT)           | 16,00        | 100            | <sup>1</sup> 28                    | 1                           | 1                         |
| 4 Rigips Feuerschutzplatte (Rigips Feuerschutzplatte) | 1,25         | 50             | <sup>1</sup> 4                     | 4                           | 3                         |
| 5 Rigips Feuerschutzplatte (Rigips Feuerschutzplatte) | 1,25         | 50             | <sup>1</sup> 4                     | 4                           | 3                         |
| <b>building element</b>                               | <b>21,00</b> |                |                                    |                             |                           |

annotations: Importiert am 06. 03. 2022: Bauteil "AW15b\_" aus Gebäude ""

<sup>1</sup> layer is OI-relevant from BG2

16. 05. 2022, Qiming SUN (Tianjin University)

## Project name: copy of CLT

### W9\_F1-8\_N\_in (interior walls, BG3)

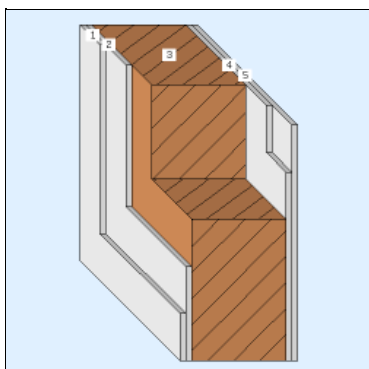

$\Sigma\Delta OI3$ : 50 points/m<sup>2</sup>

$E_{l_{kon}}$ : 0,35 points/m<sup>2</sup>

mass: 135,5 kg/m<sup>2</sup>

PENRT: 959 MJ/m<sup>2</sup>

GWP-total: -90,5 kg CO<sub>2</sub> equ./m<sup>2</sup>

AP: 0,247 kg SO<sub>2</sub> equ./m<sup>2</sup>

service life: yes, replacements rates with whole numbers (according to EN 15804 standard)

| no. layer (from inside to outside)                    | d<br>cm      | Useful life >b | $\Delta OI3$<br>pts/m <sup>2</sup> | Disposal-<br>classification | Exploitation<br>potential |
|-------------------------------------------------------|--------------|----------------|------------------------------------|-----------------------------|---------------------------|
| 1 Rigips Feuerschutzplatte (Rigips Feuerschutzplatte) | 1,25         | 50             | <sup>1</sup> 4                     | 4                           | 3                         |
| 2 Rigips Feuerschutzplatte (Rigips Feuerschutzplatte) | 1,25         | 50             | <sup>1</sup> 4                     | 4                           | 3                         |
| 3 Brettsperrholz BBS (3-lagig) (KLH® - CLT)           | 20,00        | 100            | <sup>1</sup> 35                    | 1                           | 1                         |
| 4 Rigips Feuerschutzplatte (Rigips Feuerschutzplatte) | 1,25         | 50             | <sup>1</sup> 4                     | 4                           | 3                         |
| 5 Rigips Feuerschutzplatte (Rigips Feuerschutzplatte) | 1,25         | 50             | <sup>1</sup> 4                     | 4                           | 3                         |
| <b>building element</b>                               | <b>25,00</b> |                |                                    |                             |                           |

annotations: Importiert am 06. 03. 2022: Bauteil "AW15b\_" aus Gebäude ""

<sup>1</sup> layer is OI-relevant from BG2

16. 05. 2022, Qiming SUN (Tianjin University)

## List of materials

| material                                                        | mass<br>kg | mass-<br>percentage | cumulated<br>percentage | Building<br>material ID | Density<br>kg/m³ | λ-<br>Value<br>W/m²K | PENRT<br>MJ/FU<br>(functional<br>unit) | GWP-total<br>kg CO₂ equ./FU<br>(functional unit) | AP<br>kg SO₂ equ./FU<br>(functional unit) | FU<br>(functional<br>unit) |
|-----------------------------------------------------------------|------------|---------------------|-------------------------|-------------------------|------------------|----------------------|----------------------------------------|--------------------------------------------------|-------------------------------------------|----------------------------|
| KLH® - CLT                                                      | 565.731    | 67,6%               | 67,6%                   | 2142715713              | 475              | 0,120                | 7,46                                   | -1,10                                            | 0,00226                                   | kg                         |
| Rigips Feuerschutzplatte                                        | 152.037    | 18,2%               | 85,8%                   | 2142711094              | 810              | 0,250                | 3,09                                   | 0,157                                            | 0,000399                                  | kg                         |
| Mineral thermal insulating panel (93 kg/m³)                     | 49.998     | 6,0%                | 91,7%                   | 2142715044              | 93               | 0,041                | 12,3                                   | 1,01                                             | 0,00214                                   | kg                         |
| Timber (525 kg/m³ - e.g. larch) - rough, technically dried      | 32.311     | 3,9%                | 95,6%                   | 2142715293              | 525              | 0,130                | 2,77                                   | -1,65                                            | 0,00104                                   | kg                         |
| MDF panels semi-dense fibreboard (400 kg/m³)                    | 25.569     | 3,1%                | 98,6%                   | 2142715125              | 400              | 0,100                | 11,1                                   | -1,04                                            | 0,00413                                   | kg                         |
| Timber (475 kg/m³ - e.g. spruce/fir) - rough, technically dried | 7.369      | 0,9%                | 99,5%                   | 2142715290              | 475              | 0,120                | 2,52                                   | -1,50                                            | 0,000944                                  | kg                         |
| Sheep's wool - insulation felt (18 kg/m³)                       | 2.380      | 0,3%                | 99,8%                   | 2142715068              | 18               |                      | 19,7                                   | 0,537                                            | 0,00412                                   | kg                         |
| Polyethylene (PE) sealing sheeting                              | 916        | 0,1%                | 99,9%                   | 2142712507              | 980              | 0,500                | 69,8                                   | 2,10                                             | 0,00792                                   | kg                         |
| Bauder TEC KSD, Bauder TEC KSD DUO                              | 514        | 0,1%                | 100,0%                  | 2142732461              | 1.150            | 0,170                | 41,6                                   | 0,819                                            | 0,00556                                   | kg                         |
| Sisalex™ 30                                                     | 152        | 0,0%                | 100,0%                  | 2142684992              | 800              | 0,180                | 14,2                                   | -0,953                                           | 0,00589                                   | kg                         |
| Vertical air layer, heat flow down 26 < d ≤ 30 mm               | 48         | 0,0%                | 100,0%                  | 2142684539              | 1                | 0,146                | 0,00                                   | 0,00                                             | 0,00                                      | kg                         |
| Vertical air layer, heat flow down 16 < d ≤ 20 mm               | 5          | 0,0%                | 100,0%                  | 2142684541              | 1                | 0,105                | 0,00                                   | 0,00                                             | 0,00                                      | kg                         |
