# Supplementary material
Source: MDPI journal article supplement (https://www.mdpi.com/2071-1050/14/10/6174)
Supplement: s1 [file s1]

# Ol3 Statement

Result sheet building – new building

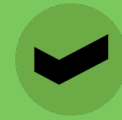

www.baubook.at/eco2soft  
Ökobilanz für Gebäude

Project name: copy of RC

## building overall

|                            |                                                                           |                                   |                                                                             |
|----------------------------|---------------------------------------------------------------------------|-----------------------------------|-----------------------------------------------------------------------------|
| <b>*Ol3 BG3 ref.</b>       | 187 points                                                                | <b>GFA:</b>                       | 3.000 m <sup>2</sup>                                                        |
| <b>Area:</b>               |                                                                           | <b>ref. area<sub>Ol</sub>:</b>    | 3.000 m <sup>2</sup>                                                        |
| <b>EI10:</b>               | 22,64 points                                                              | <b>catalog of LCA indicators:</b> | IBO benchmarks 2012                                                         |
| <b>PENRT:</b>              | 2.445 MJ / (m <sup>2</sup> ref. area <sub>Ol</sub> )                      | <b>useful life considered:</b>    | yes, replacements rates with whole numbers (according to EN 15804 standard) |
| <b>GWP-total:</b>          | 182 kg CO <sub>2</sub> equ. / (m <sup>2</sup> ref. area <sub>Ol</sub> )   | <b>study period:</b>              | 50 years                                                                    |
| <b>AP:</b>                 | 0,561 kg SO <sub>2</sub> equ. / (m <sup>2</sup> ref. area <sub>Ol</sub> ) | <b>service life catalog:</b>      | 2018                                                                        |
| <b>Guide version Ol3:</b>  | V4.0 (September 2018)                                                     |                                   |                                                                             |
| <b>Guide version EI10:</b> | V2, 2018                                                                  |                                   |                                                                             |

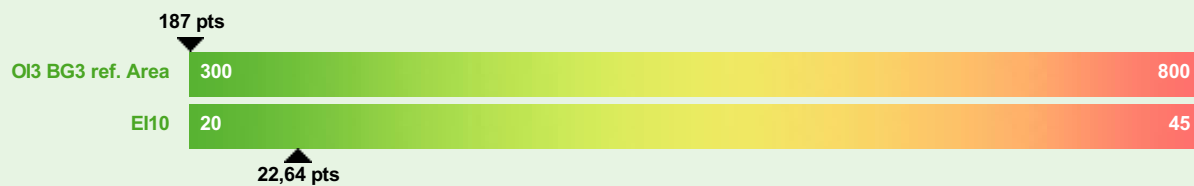

\* Taking into account the manufacturing phase (A1-A3) and the use phase (B1-B4) of EN 15804

test- and educational-version. not for commercial use!

→ subscribe to full version (with costs)

## components from the energy certificate

|                         |                  | <b>ΔOl3</b>    |                    | <b>PENRT</b> | <b>GWP-total</b>        | <b>AP</b>               | <b>EI<sub>KON</sub></b> |
|-------------------------|------------------|----------------|--------------------|--------------|-------------------------|-------------------------|-------------------------|
| quantity                | building element | BG3, ref. Area | per m <sup>2</sup> | MJ           | kg CO <sub>2</sub> equ. | kg SO <sub>2</sub> equ. | per m <sup>2</sup>      |
| 1.442,00 m <sup>2</sup> | F1_F1-8_in       | 58             | 121                | 764          | 51                      | 0,180                   | 1,59                    |
| 194,00 m <sup>2</sup>   | F2_F1-8_ex       | 4              | 55                 | 44           | 4                       | 0,012                   | 0,30                    |
| 268,00 m <sup>2</sup>   | R1               | 13             | 145                | 186          | 12                      | 0,035                   | 2,79                    |
| 1.132,00 m <sup>2</sup> | W1_F1-8_N_ex     | 36             | 97                 | 514          | 32                      | 0,105                   | 2,50                    |
| 537,00 m <sup>2</sup>   | W2_F1-8_L_in     | 26             | 143                | 347          | 24                      | 0,076                   | 2,50                    |
| <b>sum</b>              |                  |                |                    | <b>1.855</b> | <b>122</b>              | <b>0,408</b>            |                         |

## interior walls

|                         |                  | <b>ΔOl3</b>    |                    | <b>PENRT</b> | <b>GWP-total</b>        | <b>AP</b>               | <b>EI<sub>KON</sub></b> |
|-------------------------|------------------|----------------|--------------------|--------------|-------------------------|-------------------------|-------------------------|
| quantity                | building element | BG3, ref. Area | per m <sup>2</sup> | MJ           | kg CO <sub>2</sub> equ. | kg SO <sub>2</sub> equ. | per m <sup>2</sup>      |
| 2.142,00 m <sup>2</sup> | B1               | 26             | 37                 | 314          | 30,7                    | 0,081                   | 0,12                    |
| 700,00 m <sup>2</sup>   | C1               | 7              | 30                 | 82           | 8,1                     | 0,021                   | 0,09                    |
| 538,00 m <sup>2</sup>   | S1               | 3              | 19                 | 40           | 3,9                     | 0,010                   | 0,06                    |
| 1.201,00 m <sup>2</sup> | W3_F1-8_N_in     | 13             | 32                 | 147          | 17,1                    | 0,039                   | 0,29                    |
| <b>sum</b>              |                  |                |                    | <b>583</b>   | <b>59,8</b>             | <b>0,152</b>            |                         |

## old component type

|                      |                  | <b>ΔOl3</b>    |                    | <b>PENRT</b> | <b>GWP-total</b>        | <b>AP</b>               | <b>EI<sub>KON</sub></b> |
|----------------------|------------------|----------------|--------------------|--------------|-------------------------|-------------------------|-------------------------|
| quantity             | building element | BG3, ref. Area | per m <sup>2</sup> | MJ           | kg CO <sub>2</sub> equ. | kg SO <sub>2</sub> equ. | per m <sup>2</sup>      |
| 30,00 m <sup>2</sup> | R2               | 1              | 56                 | 6,56         | 0,660                   | 0,00171                 | 0,30                    |
| <b>sum</b>           |                  |                |                    | <b>6,56</b>  | <b>0,660</b>            | <b>0,00171</b>          |                         |

test- and educational-version. not for commercial use!

→ subscribe to full version (with costs)

## graphic details of solid and transparent building elements

## Project name: copy of RC

### F1\_F1-8\_in (components from the energy certificate, BG3)

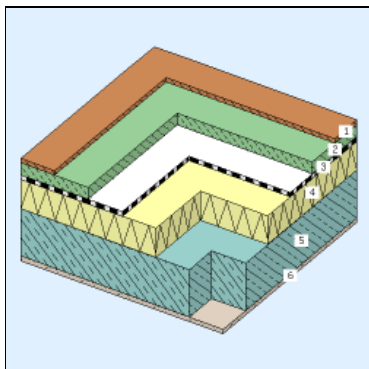

**$\Sigma\Delta OI3$ :** 121 points/m<sup>2</sup>

**$E_{kON}$ :** 1,59 points/m<sup>2</sup>

**mass:** 586,5 kg/m<sup>2</sup>

**PENRT:** 1.590 MJ/m<sup>2</sup>

**GWP-total:** 106 kg CO<sub>2</sub> equ./m<sup>2</sup>

**AP:** 0,374 kg SO<sub>2</sub> equ./m<sup>2</sup>

**service life:** yes, replacements rates with whole numbers (according to EN 15804 standard)

| no. layer                                                                                                          | d <sub>cm</sub> | Useful life >b  | $\Delta OI3$<br>pts/m <sup>2</sup> | Disposal-<br>classification | Exploitation<br>potential |
|--------------------------------------------------------------------------------------------------------------------|-----------------|-----------------|------------------------------------|-----------------------------|---------------------------|
| 1 Trittschalldämmung (Isover Akustic EP3) (Timber (525 kg/m <sup>3</sup> - e.g. larch) - rough, technically drier) | 1,30            | 50              | 0                                  | 1                           | 1                         |
| 2 Rigidur Estrichelement (Cement and cement flowing screed (1800 kg/m <sup>3</sup> ))                              | 5,00            | 50              | 8                                  | 3                           | 4                         |
| 3 Rieselschutz (Sisalex™ 30)                                                                                       | 0,01            | <sup>1</sup> 50 | <sup>2</sup> 0                     | 3                           | 3                         |
| 4 Brettsperholz BBS (5-lagig) (EPS-F grey/black (by 2010) (16.5 kg/m <sup>3</sup> ))                               | 12,00           | 35              | 24                                 | 5                           | 4                         |
| 5 schallentkoppelte U-Direktabhängiger mit Rigips CD Profil / Mineralwolle (z. B. Isover Trennwand Filz)           | 20,00           | 100             | 63                                 | 2                           | 2                         |
| 6 Silicate plaster with synthetic resin additive, reinforced                                                       | 0,70            | 35              | 26                                 | 2                           | 5                         |
| <b>building element</b>                                                                                            | <b>39,01</b>    |                 |                                    |                             |                           |

**annotations:** Importiert am 06. 03. 2022: Bauteil "DE06e\_" aus Gebäude ""

<sup>1</sup> self-entered value <sup>2</sup> layer is OI-relevant from BG1

16. 05. 2022, Qiming SUN (Tianjin University)

## Project name: copy of RC

### F2\_F1-8\_ex (components from the energy certificate, BG3)

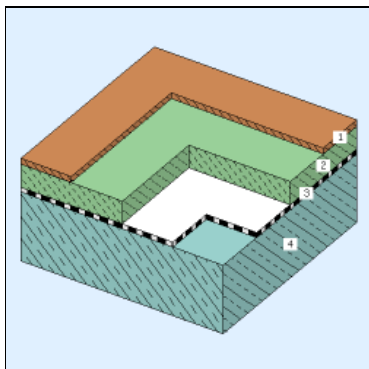

**$\Sigma\Delta OI3$ :** 55 points/m<sup>2</sup>

**$E_{kON}$ :** 0,30 points/m<sup>2</sup>

**mass:** 453,2 kg/m<sup>2</sup>

**PENRT:** 676 MJ/m<sup>2</sup>

**GWP-total:** 54,6 kg CO<sub>2</sub> equ./m<sup>2</sup>

**AP:** 0,178 kg SO<sub>2</sub> equ./m<sup>2</sup>

**service life:** yes, replacements rates with whole numbers (according to EN 15804 standard)

| no. layer                                                                                                          | d <sub>cm</sub> | Useful life >b  | $\Delta OI3$<br>pts/m <sup>2</sup> | Disposal-<br>classification | Exploitation<br>potential |
|--------------------------------------------------------------------------------------------------------------------|-----------------|-----------------|------------------------------------|-----------------------------|---------------------------|
| 1 Trittschalldämmung (Isover Akustic EP3) (Timber (525 kg/m <sup>3</sup> - e.g. larch) - rough, technically drier) | 1,30            | 50              | 0                                  | 1                           | 1                         |
| 2 Splittschüttung gebunden (Cement and cement flowing screed (1800 kg/m <sup>3</sup> ))                            | 5,00            | 50              | 8                                  | 3                           | 4                         |
| 3 Rieselschutz (Sisalex™ 30)                                                                                       | 0,01            | <sup>1</sup> 50 | <sup>2</sup> 0                     | 3                           | 3                         |
| 4 schallentkoppelte U-Direktabhängiger mit Rigips CD Profil / Mineralwolle (z. B. Isover Trennwand Filz)           | 15,00           | 100             | 47                                 | 2                           | 2                         |
| <b>building element</b>                                                                                            | <b>21,31</b>    |                 |                                    |                             |                           |

**annotations:** Importiert am 06. 03. 2022: Bauteil "DE06e\_" aus Gebäude ""

<sup>1</sup> self-entered value <sup>2</sup> layer is OI-relevant from BG1

16. 05. 2022, Qiming SUN (Tianjin University)

## Project name: copy of RC

### R1 (components from the energy certificate, BG3)

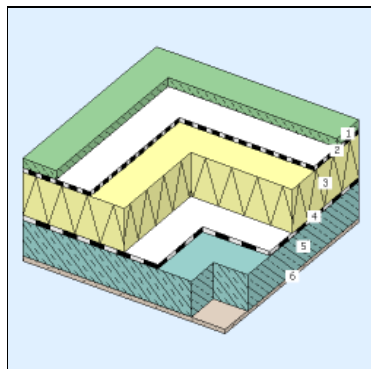

$\Sigma \Delta OI3$ : 145 points/m<sup>2</sup>

$E_{l,KON}$ : 2,79 points/m<sup>2</sup>

mass: 583,6 kg/m<sup>2</sup>

PENRT: 2.085 MJ/m<sup>2</sup>

GWP-total: 133 kg CO<sub>2</sub> equ./m<sup>2</sup>

AP: 0,397 kg SO<sub>2</sub> equ./m<sup>2</sup>

service life: yes, replacements rates with whole numbers (according to EN 15804 standard)

0,140 W/m<sup>2</sup>K

U value <sup>3</sup>

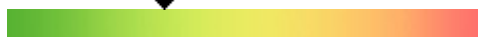

A

OI-Class (BG3) <sup>4</sup>

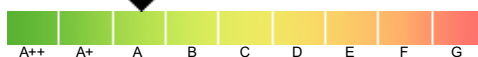

| no. layer                                                                                                 | d<br>cm      | Useful life >b  | $\Delta OI3$<br>pts/m <sup>2</sup> | Disposal-<br>classification | Exploitation<br>potential |
|-----------------------------------------------------------------------------------------------------------|--------------|-----------------|------------------------------------|-----------------------------|---------------------------|
| 1 Cement and cement flowing screed (1800 kg/m <sup>3</sup> )                                              | 5,00         | 50              | 8                                  | 3                           | 4                         |
| 2 gewebearmierte Kunststoff-Schweißbahn (>1,7 kg/m <sup>2</sup> ) (Polyethylene (PE) sealing sheeting)    | 0,25         | 25              | <sup>1</sup> 18                    | 3                           | 4                         |
| 3 Expandiertes Polystyrol (Gefälledämmung) (EPS-F grey/black (by 2010) (16.5 kg/m <sup>3</sup> ))         | 24,00        | 35              | 47                                 | 5                           | 4                         |
| 4 Abdichtungsbahn (sd=220m) (Bauder TEC KSD, Bauder TEC KSD DUO)                                          | 0,15         | <sup>2</sup> 50 | <sup>1</sup> 4                     | 3                           | 5                         |
| 5 Brettsperrholz BBS (5-lagig) (Reinforced concrete 140 kg/m <sup>3</sup> reinforcing steel (1.75 vol.%)) | 20,00        | 100             | 63                                 | 2                           | 2                         |
| 6 Brettsperrholz BBS (5-lagig) (Normal plastering mortar GP lime (1500 kg/m <sup>3</sup> ))               | 0,70         | 35              | 4                                  | 2                           | 3                         |
| <b>building element</b>                                                                                   | <b>50,10</b> |                 |                                    |                             |                           |

annotations: Importiert am 06. 03. 2022: Bauteil "DA05a\_" aus Gebäude ""

<sup>1</sup> layer is OI-relevant from BG1 <sup>2</sup> self-entered value <sup>3</sup> U value (Heat transfer coefficient) calculated according to ÖNORM EN ISO 6946. <sup>4</sup> For the OI class, the U-value of the component is taken into account in addition to the ecological key figures

16. 05. 2022, Qiming SUN (Tianjin University)

## Project name: copy of RC

### W1\_F1-8\_N\_ex (components from the energy certificate, BG3)

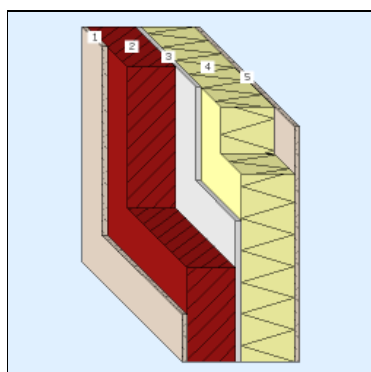

$\Sigma \Delta OI3$ : 97 points/m<sup>2</sup>

$E_{l,KON}$ : 2,50 points/m<sup>2</sup>

mass: 327,7 kg/m<sup>2</sup>

PENRT: 1.363 MJ/m<sup>2</sup>

GWP-total: 84,4 kg CO<sub>2</sub> equ./m<sup>2</sup>

AP: 0,279 kg SO<sub>2</sub> equ./m<sup>2</sup>

service life: yes, replacements rates with whole numbers (according to EN 15804 standard)

0,150 W/m<sup>2</sup>K

U value <sup>1</sup>

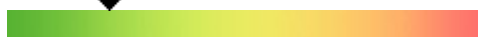

A

OI-Class (BG3) <sup>2</sup>

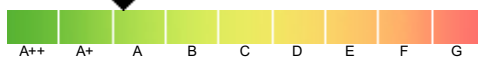

| no. layer (from inside to outside)                           | d<br>cm      | Useful life >b | $\Delta OI3$<br>pts/m <sup>2</sup> | Disposal-<br>classification | Exploitation<br>potential |
|--------------------------------------------------------------|--------------|----------------|------------------------------------|-----------------------------|---------------------------|
| 1 Normal plastering mortar GP lime (1500 kg/m <sup>3</sup> ) | 1,50         | 35             | 8                                  | 2                           | 3                         |
| 2 Hollow concrete blocks (1400 kg/m <sup>3</sup> )           | 20,00        | 100            | 17                                 | 2                           | 2                         |
| 3 Mineral adhesive                                           | 0,50         | 50             | 3                                  | 3                           | 5                         |
| 4 EPS-F grey/black (by 2010) (16.5 kg/m <sup>3</sup> )       | 22,00        | 35             | 43                                 | 5                           | 4                         |
| 5 Silicate plaster with synthetic resin additive, reinforced | 0,70         | 35             | 26                                 | 2                           | 5                         |
| <b>building element</b>                                      | <b>44,70</b> |                |                                    |                             |                           |

annotations: Importiert am 06. 03. 2022: Bauteil "AW 00a Betonhohlsteinmauerwerk mit Innen- und Außenputz (EPS)" aus Gebäude ""

<sup>1</sup> U value (Heat transfer coefficient) calculated according to ÖNORM EN ISO 6946. <sup>2</sup> For the OI class, the U-value of the component is taken into account in addition to the ecological key figures

16. 05. 2022, Qiming SUN (Tianjin University)

## Project name: copy of RC

### W2\_F1-8\_L\_in (components from the energy certificate, BG3)

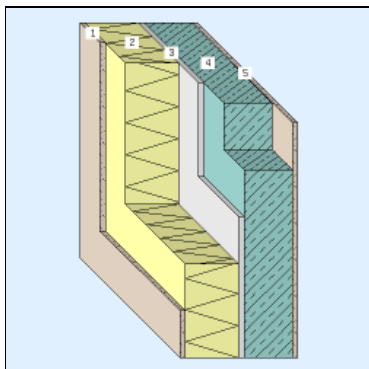

**$\Sigma\Delta OI3$ :** 143 points/m<sup>2</sup>  
 **$E_{l_{KON}}$ :** 2,50 points/m<sup>2</sup>  
**mass:** 522,7 kg/m<sup>2</sup>  
**PENRT:** 1.936 MJ/m<sup>2</sup>  
**GWP-total:** 131 kg CO<sub>2</sub> equ./m<sup>2</sup>  
**AP:** 0,423 kg SO<sub>2</sub> equ./m<sup>2</sup>  
**service life:** yes, replacements rates with whole numbers (according to EN 15804 standard)

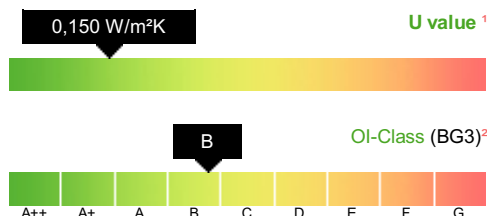

| no. layer (from inside to outside)                                         | d<br>cm      | Useful life >b | $\Delta OI3$<br>pts/m <sup>2</sup> | Disposal-<br>classification | Exploitation<br>potential |
|----------------------------------------------------------------------------|--------------|----------------|------------------------------------|-----------------------------|---------------------------|
| 1 Silicate plaster with synthetic resin additive, reinforced               | 0,70         | 35             | 26                                 | 2                           | 5                         |
| 2 EPS-F grey/black (by 2010) (16.5 kg/m <sup>3</sup> )                     | 22,00        | 35             | 43                                 | 5                           | 4                         |
| 3 Mineral adhesive                                                         | 0,50         | 50             | 3                                  | 3                           | 5                         |
| 4 Reinforced concrete 140 kg/m <sup>3</sup> reinforcing steel (1.75 vol.%) | 20,00        | 100            | 63                                 | 2                           | 2                         |
| 5 Normal plastering mortar GP lime (1500 kg/m <sup>3</sup> )               | 1,50         | 35             | 8                                  | 2                           | 3                         |
| <b>building element</b>                                                    | <b>44,70</b> |                |                                    |                             |                           |

**annotations:** Importiert am 06. 03. 2022: Bauteil "AW 00a Betonhohlsteinmauerwerk mit Innen- und Außenputz (EPS)" aus Gebäude ""

<sup>1</sup> U value (Heat transfer coefficient) calculated according to ÖNORM EN ISO 6946. <sup>2</sup> For the OI class, the U-value of the component is taken into account in addition to the ecological key figures

16. 05. 2022, Qiming SUN (Tianjin University)

## Project name: copy of RC

### B1 (interior walls, BG3)

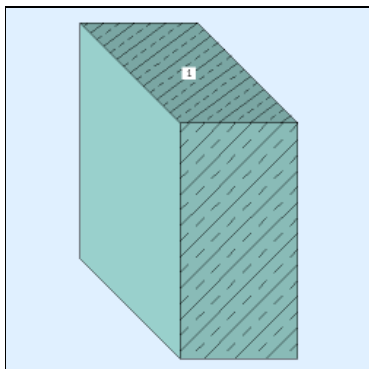

**$\Sigma\Delta OI3$ :** 37 points/m<sup>2</sup>  
 **$E_{l_{KON}}$ :** 0,12 points/m<sup>2</sup>  
**mass:** 277,9 kg/m<sup>2</sup>  
**PENRT:** 439 MJ/m<sup>2</sup>  
**GWP-total:** 43,0 kg CO<sub>2</sub> equ./m<sup>2</sup>  
**AP:** 0,114 kg SO<sub>2</sub> equ./m<sup>2</sup>  
**service life:** yes, replacements rates with whole numbers (according to EN 15804 standard)

| no. layer (from inside to outside)                                                                        | d<br>cm      | Useful life >b | $\Delta OI3$<br>pts/m <sup>2</sup> | Disposal-<br>classification | Exploitation<br>potential |
|-----------------------------------------------------------------------------------------------------------|--------------|----------------|------------------------------------|-----------------------------|---------------------------|
| 1 Brettsperrholz BBS (3-lagig) (Reinforced concrete 140 kg/m <sup>3</sup> reinforcing steel (1.75 vol.%)) | 11,70        | 100            | <sup>1</sup> 37                    | 2                           | 2                         |
| <b>building element</b>                                                                                   | <b>11,70</b> |                |                                    |                             |                           |

**annotations:** Importiert am 06. 03. 2022: Bauteil "IW01b\_" aus Gebäude ""

<sup>1</sup> layer is OI-relevant from BG3

16. 05. 2022, Qiming SUN (Tianjin University)

## Project name: copy of RC

### C1 (interior walls, BG3)

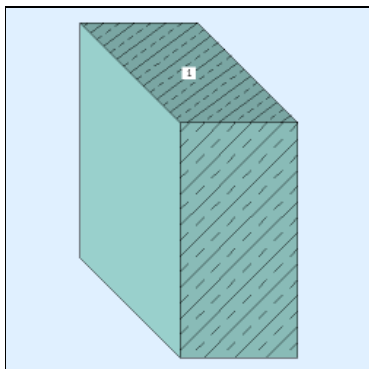

**$\Sigma\Delta\text{OI3}$ :** 30 points/m<sup>2</sup>

**$\text{EI}_{\text{KON}}$ :** 0,09 points/m<sup>2</sup>

**mass:** 223,3 kg/m<sup>2</sup>

**PENRT:** 353 MJ/m<sup>2</sup>

**GWP-total:** 34,5 kg CO<sub>2</sub> equ./m<sup>2</sup>

**AP:** 0,0913 kg SO<sub>2</sub> equ./m<sup>2</sup>

**service life:** yes, replacements rates with whole numbers (according to EN 15804 standard)

| no.                     | layer (from inside to outside)                                                                          | d<br>cm     | Useful life >b | $\Delta\text{OI3}$<br>pts/m <sup>2</sup> | Disposal-<br>classification | Exploitation<br>potential |
|-------------------------|---------------------------------------------------------------------------------------------------------|-------------|----------------|------------------------------------------|-----------------------------|---------------------------|
| 1                       | Brettsper Holz BBS (3-lagig) (Reinforced concrete 140 kg/m <sup>3</sup> reinforcing steel (1.75 vol.%)) | 9,40        | 100            | <sup>1</sup> 30                          | 2                           | 2                         |
| <b>building element</b> |                                                                                                         | <b>9,40</b> |                |                                          |                             |                           |

**annotations:** Importiert am 06. 03. 2022: Bauteil "IW01b\_" aus Gebäude ""

<sup>1</sup> layer is OI-relevant from BG3

16. 05. 2022, Qiming SUN (Tianjin University)

## Project name: copy of RC

### S1 (interior walls, BG3)

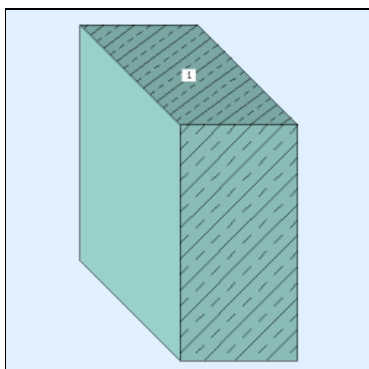

**$\Sigma\Delta\text{OI3}$ :** 19 points/m<sup>2</sup>

**$\text{EI}_{\text{KON}}$ :** 0,06 points/m<sup>2</sup>

**mass:** 140,1 kg/m<sup>2</sup>

**PENRT:** 222 MJ/m<sup>2</sup>

**GWP-total:** 21,7 kg CO<sub>2</sub> equ./m<sup>2</sup>

**AP:** 0,0573 kg SO<sub>2</sub> equ./m<sup>2</sup>

**service life:** yes, replacements rates with whole numbers (according to EN 15804 standard)

| no.                     | layer (from inside to outside)                                                                          | d<br>cm     | Useful life >b | $\Delta\text{OI3}$<br>pts/m <sup>2</sup> | Disposal-<br>classification | Exploitation<br>potential |
|-------------------------|---------------------------------------------------------------------------------------------------------|-------------|----------------|------------------------------------------|-----------------------------|---------------------------|
| 1                       | Brettsper Holz BBS (3-lagig) (Reinforced concrete 140 kg/m <sup>3</sup> reinforcing steel (1.75 vol.%)) | 5,90        | 100            | <sup>1</sup> 19                          | 2                           | 2                         |
| <b>building element</b> |                                                                                                         | <b>5,90</b> |                |                                          |                             |                           |

**annotations:** Importiert am 06. 03. 2022: Bauteil "IW01b\_" aus Gebäude ""

<sup>1</sup> layer is OI-relevant from BG3

16. 05. 2022, Qiming SUN (Tianjin University)

## Project name: copy of RC

### W3\_F1-8\_N\_in (interior walls, BG3)

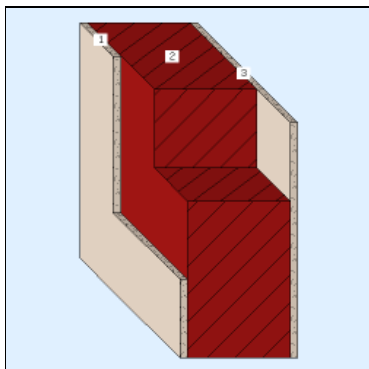

$\Sigma\Delta\text{OI3}$ : 32 points/m<sup>2</sup>

$\text{EI}_{\text{KON}}$ : 0,29 points/m<sup>2</sup>

mass: 325,0 kg/m<sup>2</sup>

PENRT: 368 MJ/m<sup>2</sup>

GWP-total: 42,8 kg CO<sub>2</sub> equ./m<sup>2</sup>

AP: 0,0978 kg SO<sub>2</sub> equ./m<sup>2</sup>

service life: yes, replacements rates with whole numbers (according to EN 15804 standard)

| no. layer (from inside to outside)                                                      | d <sub>cm</sub> | Useful life >b | $\Delta\text{OI3}$<br>pts/m <sup>2</sup> | Disposal-<br>classification | Exploitation<br>potential |
|-----------------------------------------------------------------------------------------|-----------------|----------------|------------------------------------------|-----------------------------|---------------------------|
| 1 Rigips Feuerschutzplatte (Normal plastering mortar GP lime (1500 kg/m <sup>3</sup> )) | 1,50            | 35             | <sup>1</sup> 8                           | 2                           | 3                         |
| 2 Brettsperrholz BBS (3-lagig) (Hollow concrete blocks (1400 kg/m <sup>3</sup> ))       | 20,00           | 100            | <sup>1</sup> 17                          | 2                           | 2                         |
| 3 Rigips Feuerschutzplatte (Normal plastering mortar GP lime (1500 kg/m <sup>3</sup> )) | 1,50            | 35             | <sup>1</sup> 8                           | 2                           | 3                         |
| <b>building element</b>                                                                 | <b>23,00</b>    |                |                                          |                             |                           |

annotations: Importiert am 06. 03. 2022: Bauteil "AW15b\_" aus Gebäude ""

<sup>1</sup> layer is OI-relevant from BG2

16. 05. 2022, Qiming SUN (Tianjin University)

## Project name: copy of RC

### R2 (old component type, BG3)

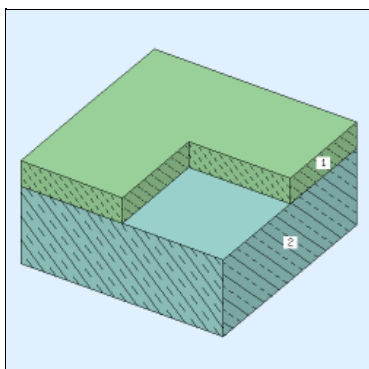

$\Sigma\Delta\text{OI3}$ : 56 points/m<sup>2</sup>

$\text{EI}_{\text{KON}}$ : 0,30 points/m<sup>2</sup>

mass: 446,3 kg/m<sup>2</sup>

PENRT: 656 MJ/m<sup>2</sup>

GWP-total: 66,0 kg CO<sub>2</sub> equ./m<sup>2</sup>

AP: 0,171 kg SO<sub>2</sub> equ./m<sup>2</sup>

service life: yes, replacements rates with whole numbers (according to EN 15804 standard)

U value <sup>1</sup>

3,630 W/m<sup>2</sup>K

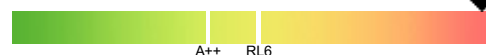

OI-Class (BG3) <sup>2</sup>

G

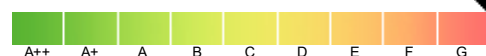

| no. layer                                                                  | d <sub>cm</sub> | Useful life >b | $\Delta\text{OI3}$<br>pts/m <sup>2</sup> | Disposal-<br>classification | Exploitation<br>potential |
|----------------------------------------------------------------------------|-----------------|----------------|------------------------------------------|-----------------------------|---------------------------|
| 1 Cement and cement flowing screed (1800 kg/m <sup>3</sup> )               | 5,00            | 50             | 8                                        | 3                           | 4                         |
| 2 Reinforced concrete 140 kg/m <sup>3</sup> reinforcing steel (1.75 vol.%) | 15,00           | 100            | 47                                       | 2                           | 2                         |
| <b>building element</b>                                                    | <b>20,00</b>    |                |                                          |                             |                           |

annotations: Importiert am 06. 03. 2022: Bauteil "De 03: Kellerdecke, Stahlbeton" aus Gebäude ""

<sup>1</sup> U value (Heat transfer coefficient) calculated according to ÖNORM EN ISO 6946. A++: U-Werte im Bereich der Markierung A++ (0,14 W/m<sup>2</sup>K) sind notwendig, um derartige Gebäude zu errichten. RL6: OIB Richtlinie 6 (April 2007); In ganz Österreich seit 1.1.08 verbindlich festgelegter max. U-Wert (0,20 W/m<sup>2</sup>K) für alle Neubauten sowie instandgesetzte bzw. erneuerte Bauteile. <sup>2</sup> For the OI class, the U-value of the component is taken into account in addition to the ecological key figures

16. 05. 2022, Qiming SUN (Tianjin University)

## List of materials

| material                                                        | mass<br>kg | mass-<br>percentage | cumulated<br>percentage | Building<br>material ID | Density<br>kg/m³ | λ-<br>Value<br>W/m²K | PENRT<br>MJ/FU<br>(functional<br>unit) | GWP-total<br>kg CO₂ equ./FU<br>(functional unit) | AP<br>kg SO₂ equ./FU<br>(functional unit) | FU<br>(functional<br>unit) |
|-----------------------------------------------------------------|------------|---------------------|-------------------------|-------------------------|------------------|----------------------|----------------------------------------|--------------------------------------------------|-------------------------------------------|----------------------------|
| Reinforced concrete 140 kg/m³<br>reinforcing steel (1.75 vol.%) | 1.973.996  | 66,4%               | 66,4%                   | 2142717549              | 2.375            | 2,500                | 1,58                                   | 0,155                                            | 0,000409                                  | kg                         |
| Hollow concrete blocks (1400 kg/m³)                             | 653.240    | 22,0%               | 88,4%                   | 2142714718              | 1.400            | 1,200                | 0,636                                  | 0,0951                                           | 0,000181                                  | kg                         |
| Cement and cement flowing screed<br>(1800 kg/m³)                | 174.060    | 5,9%                | 94,2%                   | 2142714882              | 1.800            | 1,100                | 1,03                                   | 0,120                                            | 0,000278                                  | kg                         |
| Normal plastering mortar GP lime (1500<br>kg/m³)                | 94.412     | 3,2%                | 97,4%                   | 2142714785              | 1.500            | 0,670                | 2,11                                   | 0,178                                            | 0,000524                                  | kg                         |
| Silicate plaster with synthetic resin<br>additive, reinforced   | 39.199     | 1,3%                | 98,7%                   | 2142684396              | 1.800            | 0,800                | 13,3                                   | 0,651                                            | 0,00350                                   | kg                         |
| Mineral adhesive                                                | 15.021     | 0,5%                | 99,2%                   | 2142684362              | 1.800            | 1,000                | 4,07                                   | 0,341                                            | 0,000954                                  | kg                         |
| Timber (525 kg/m³ - e.g. larch) - rough,<br>technically dried   | 11.166     | 0,4%                | 99,6%                   | 2142715293              | 525              | 0,130                | 2,77                                   | -1,65                                            | 0,00104                                   | kg                         |
| EPS-F grey/black (by 2010) (16.5<br>kg/m³)                      | 9.975      | 0,3%                | 100,0%                  | 2142714936              | 17               | 0,035                | 98,9                                   | 4,17                                             | 0,0149                                    | kg                         |
| Polyethylene (PE) sealing sheeting                              | 657        | 0,0%                | 100,0%                  | 2142712507              | 980              | 0,500                | 69,8                                   | 2,10                                             | 0,00792                                   | kg                         |
| Bauder TEC KSD, Bauder TEC KSD<br>DUO                           | 462        | 0,0%                | 100,0%                  | 2142732461              | 1.150            | 0,170                | 41,6                                   | 0,819                                            | 0,00556                                   | kg                         |
| Sisalex™ 30                                                     | 131        | 0,0%                | 100,0%                  | 2142684992              | 800              | 0,180                | 14,2                                   | -0,953                                           | 0,00589                                   | kg                         |
